# Supplementary material for: Solid phase microextraction (SPME) combined with TGA as a technique for guest analysis in crystal engineering
Source: Royal Society of Chemistry journal article supplement (doi:10.1039/c4ce00419a), 2014-01-01
Supplement: c4ce00419a1.pdf [file c4ce00419a1.pdf]

## Identification of Guest Molecules within Hydrogen Bonded Frameworks Extracted from TGA Exhaust Gas Using Solid Phase Microextraction Fibers

Matthew J. Fischer and Alicia M. Beatty

*Department of Chemistry and Biochemistry and the Center for Nanoscience, University of Missouri – St. Louis, St. Louis, MO*

63121 USA

### Electronic Supplementary Information

#### General Procedures:

##### Powder XRD

Crystals of **1** were collected from growth solutions and washed with methanol (1x) and acetone (2x). The crystals were then dried under vacuum to remove any remaining surface residues. The crystals were finely ground immediately prior to powder XRD analysis. The ground sample was placed onto a glass slide and pressed flat with microscope slide. PXRD patterns were collected on a Rigaku Ultima IV X-ray diffractometer containing a CuK $\alpha$  source ( $\lambda$  = 1.54051 Å) and viewed with MDI Jade 9 software. XRD patterns were then collected from  $2\theta$  = 2° to 40°.

##### Thermogravimetric Analysis

Crystals of **1** were collected from growth solutions and washed with methanol (1x) and acetone (2x). The crystals were then dried under vacuum to remove any remaining surface residues. The crystals were immediately transferred to a platinum TGA pan for analysis. TGA data was then collected using a Thermal Advantage TGA Q50 (TA Instruments) and TA Universal Analysis software for data analysis. TGA data was collected from 40°C up to 550°C depending on the sample with an initial 3 minute hold at 40°C. The heating rate was 10°C/minute.

##### Gas Chromatography/Mass Spectrometer

An HP gas chromatograph 5900 and HP gas chromatography mass spectrometer 5988A were used to collect all chromatographic data. For GC/GCMS method development, the isolated crystals were placed inside of a 20mL GC headspace vial (Xpertek, P.J. Cobert, Cat#954040) with a high temperature rated septa within the cap (Xpertek, P.J. Cobert, Cat#952237). The standalone GC was only used for initial aspects of **1**·toluene analysis. The GC oven temperature was initially 30°C for 3.0 minutes, then ramped to 150°C at a rate of 20°C/min and held for 1.0 minute. The injection port temperature was 250°C. The total analysis time was 10.50 minutes. The GC used an 15m SPB-1 column, 10 $\mu$ m film thickness, 0.2mm ID, bonded, 100% dimethyl siloxane stationary phase. The GCMS oven temperature was initially 30°C for 3.0 minutes, then ramped to 150°C at a rate of 20°C/min and held for 1.0 minute. The injection port temperature was 250°C. The total analysis time was 10.50 minutes. GCMS guest determinations were performed using an 11m HP-1 Ultra column, with a 0.2mm I.D x 0.33 $\mu$ m film.

The following SPME fibers were used during the course of this research:

- a) 100  $\mu\text{m}$  polydimethyl siloxane (PDMS) coated SPME fiber (Supelco, Cat# 57300-U)
- b) 7 $\mu\text{m}$  PDMS coated SPME fiber (Supelco, Cat#57302)
- c) 85 $\mu\text{m}$  polyacrylate (PA) coated SPME fiber (Supelco, Cat# 57305)

### Guest Evolution Studies

A new approach was used to determine that the toluene guest molecule was still evolving from the framework and was not just part of the head space. To show this, a new crystal (20mg) was placed in a headspace vial and then placed into a heating block well. The block had been pre-heated to 110°C. 110°C was a peak maximum from the TGA derivative plot. 10 $\mu\text{L}$  of headspace was sampled every minute for ten minutes using a gastight syringe with built-in valve and injected into the GCMS (Table S.1). The hole created by the syringe was covered with fresh Para film in between sample injections. The area count increased to a maximum within two minutes. After two minutes, the peaks did not increase greatly in intensity other than what could be explained by fluctuations due to sampling error since the test was performed manually.

Table S.1 – Measured peak areas for timed extractions of the toluene guest

| Time<br>(Mins) | Injection<br>Number | Peak Area<br>(Abundance) |
|----------------|---------------------|--------------------------|
| 0              | 1                   | 368440                   |
| 1              | 2                   | 734970                   |
| 2              | 3                   | 6336325                  |
| 3              | 4                   | 4683424                  |
| 4              | 5                   | 4315510                  |
| 5              | 6                   | 8186782                  |
| 6              | 7                   | 2483174                  |
| 7              | 8                   | 4255166                  |
| 8              | 9                   | 3837816                  |
| 9              | 10                  | 4949555                  |
| 10             | 11                  | 3824192                  |

### Guest Evolution and TGA Analysis

GCMS parameters were used for detection of the guest. The average weight of the sample for this series was 23mg. An 85  $\mu\text{m}$  polyacrylate SPME fiber was used for this study. The TGA was loaded with a platinum tray and the guest-containing crystal. The TGA program was set to immediately increase to 40°C and then perform an isotherm for 3 minutes. A heating ramp would then increase the temperature by 10°C/min until 500°C. It was assumed from the TGA that guest would not be detectable at 145°C. The fiber was left to the side of the instrument well away from the exhaust while the temperature ramped. At a specific temperature, the fiber was then introduced to the exhaust port of the TGA and immediately exposed for absorption

At each temperature point, the fiber was exposed until the TGA reached 145°C. Working backwards from 130°C - 100°C, the absorption time for the fiber is increase because of the heating ramp of 10°C/min. For example, the fiber would be exposed to off-gas for 1.5 minutes from 130°C -145°C and injected. On a new sample, the fiber would then be exposed to off-gas for 2.5 minutes from 120°C - 145°C and so on. It was expected that the concentration of the guest molecule should increase and thus give an increase in peak area once the fiber has desorbed into the GCMS. To compensate for the long exposure time of the fiber at lower temperatures, the total time (+30s) of exposure from 100°C to 145°C was used for 140°C to show that little guest remained at the tail of the TGA peak at that temperature. The temperature ramp was held at an isotherm at 140°C for the five minute interval. If the peak area is compared between 130°C and 140°C, based on the longer exposure time, there is likely a lower concentration of guest molecule left in the framework at 140°C than 130°C. This is comparable to what is seen in the TGA derivative overlay plot.

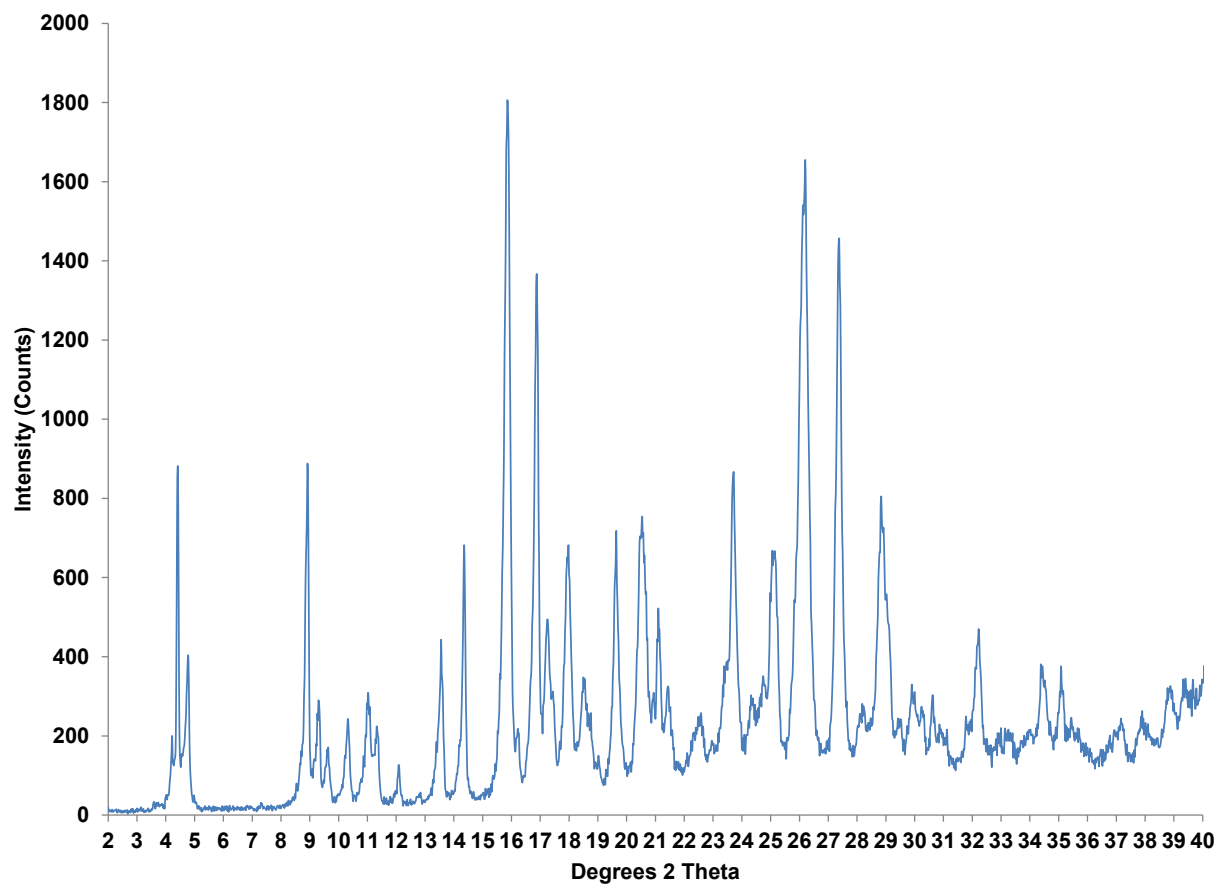

Figure S.1. – Powder XRD of **1**•toluene guest filled framework

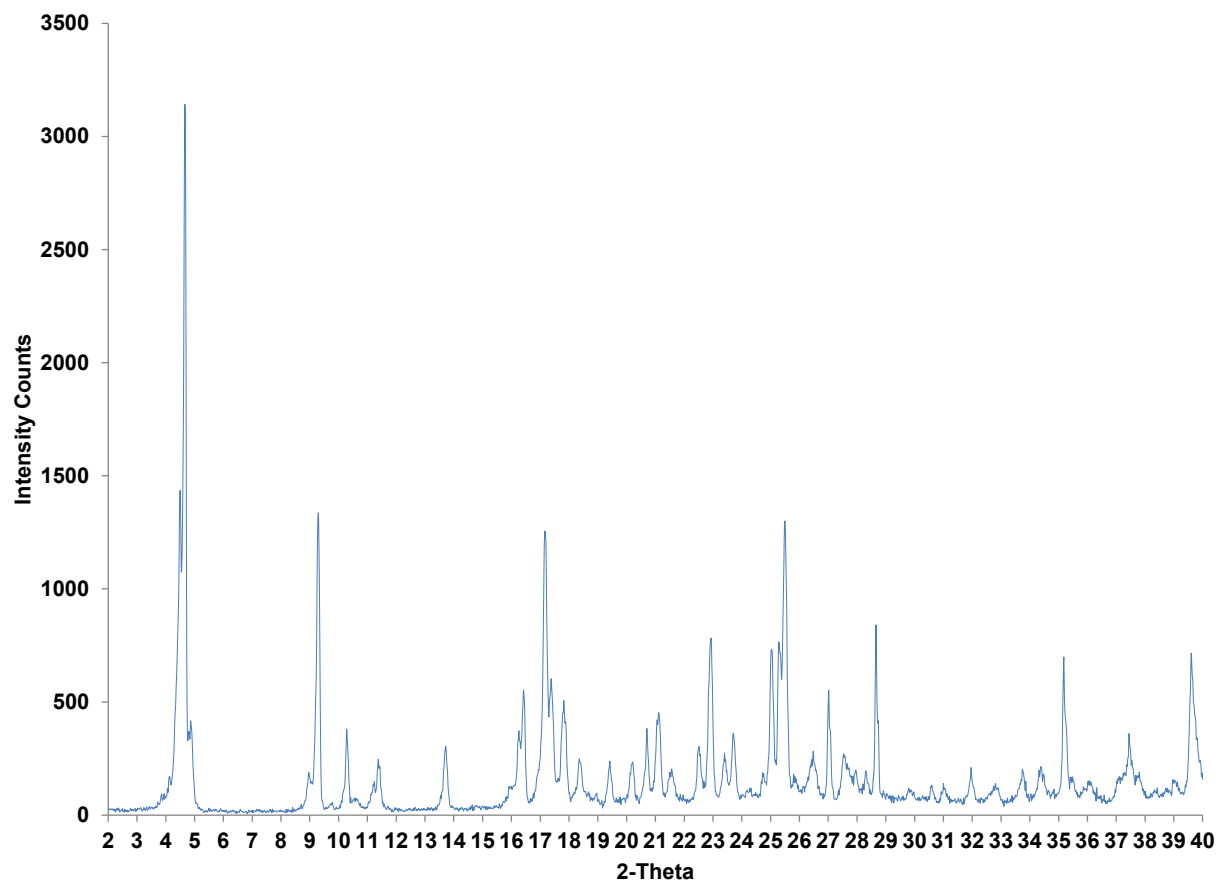

Figure S.2 – Powder XRD of 1-m-xylene and 1,3-diethylbenzene guest filled framework

File : C:\HPCHEM\1\DATA\MATT\_F\JUN13\06192013\TOL\_60C.D  
Operator : Matt  
Acquired : 19 Jun 2013 21:31 using AcqMethod MATT\_F  
Instrument : CSS Instr  
Sample Name: Tol guest in Framwork, DB-1 Column  
Misc Info : Ti=30C,3mins, Tf=150C, 20C/min, 1min  
Vial Number: 1

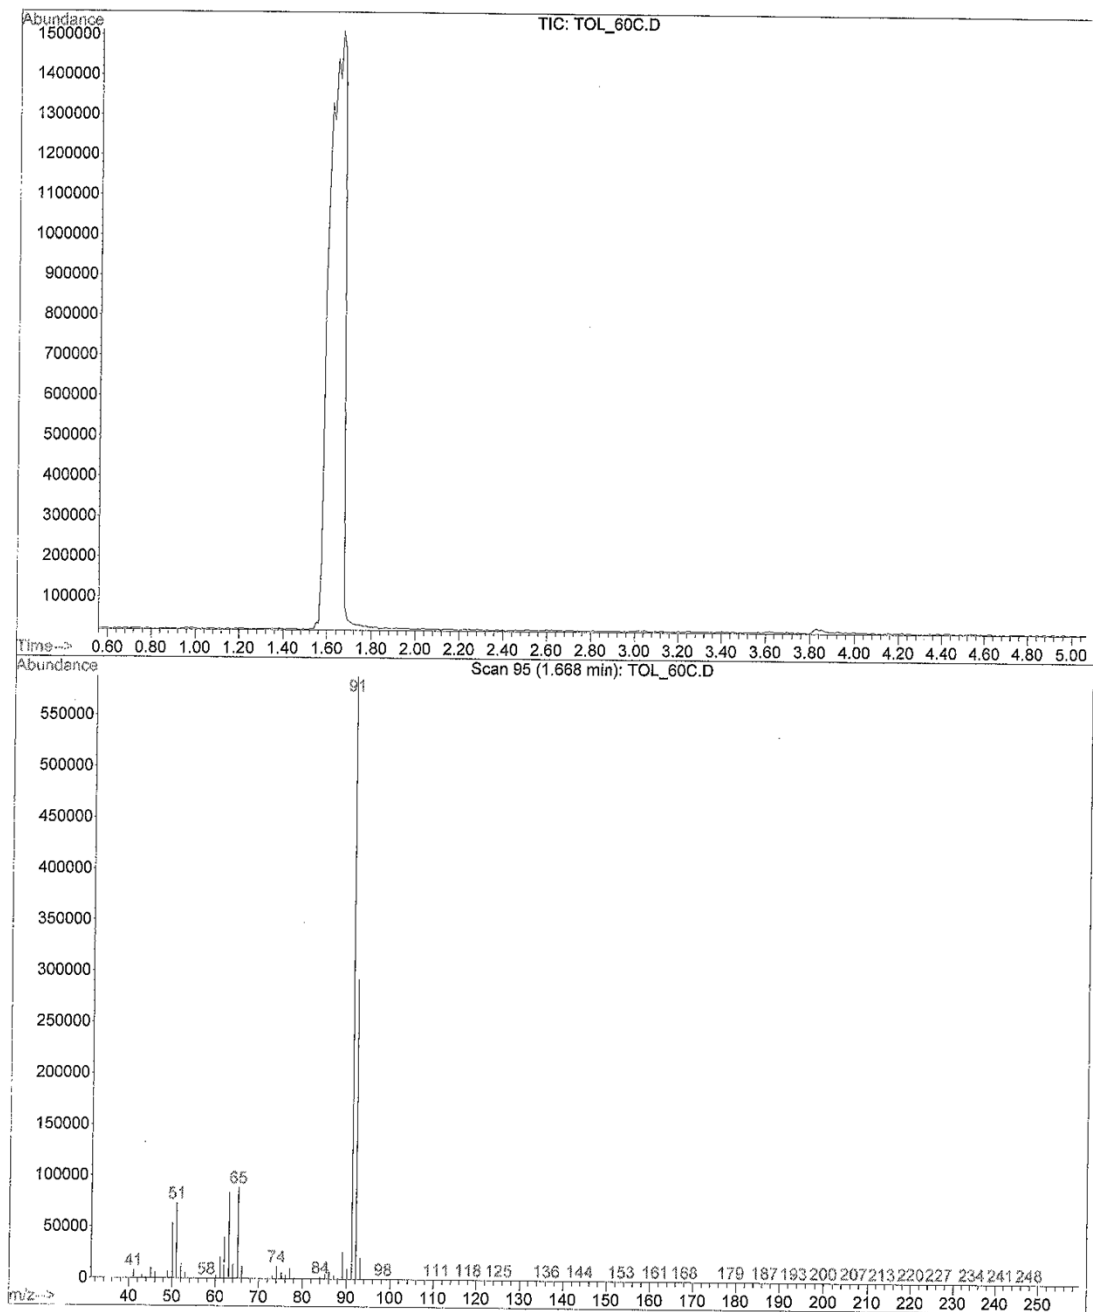

Figure S.3 – GC chromatograph of GC determination of toluene from 1 for GC parameters

File : C:\HPCHEM\2\DATA\MATT\_F\04112013\TOLU1.D  
Operator : Matt  
Acquired : 11 Apr 2013 20:09 using AcqMethod MATT\_F2.M  
Instrument : HP5890  
Sample Name: toluene, SPME determination, DB-5 Column  
Misc Info : Ti=30C, 20C/min, 3m, Tf=150C, 20C/min 1.00m  
Vial Number: 1

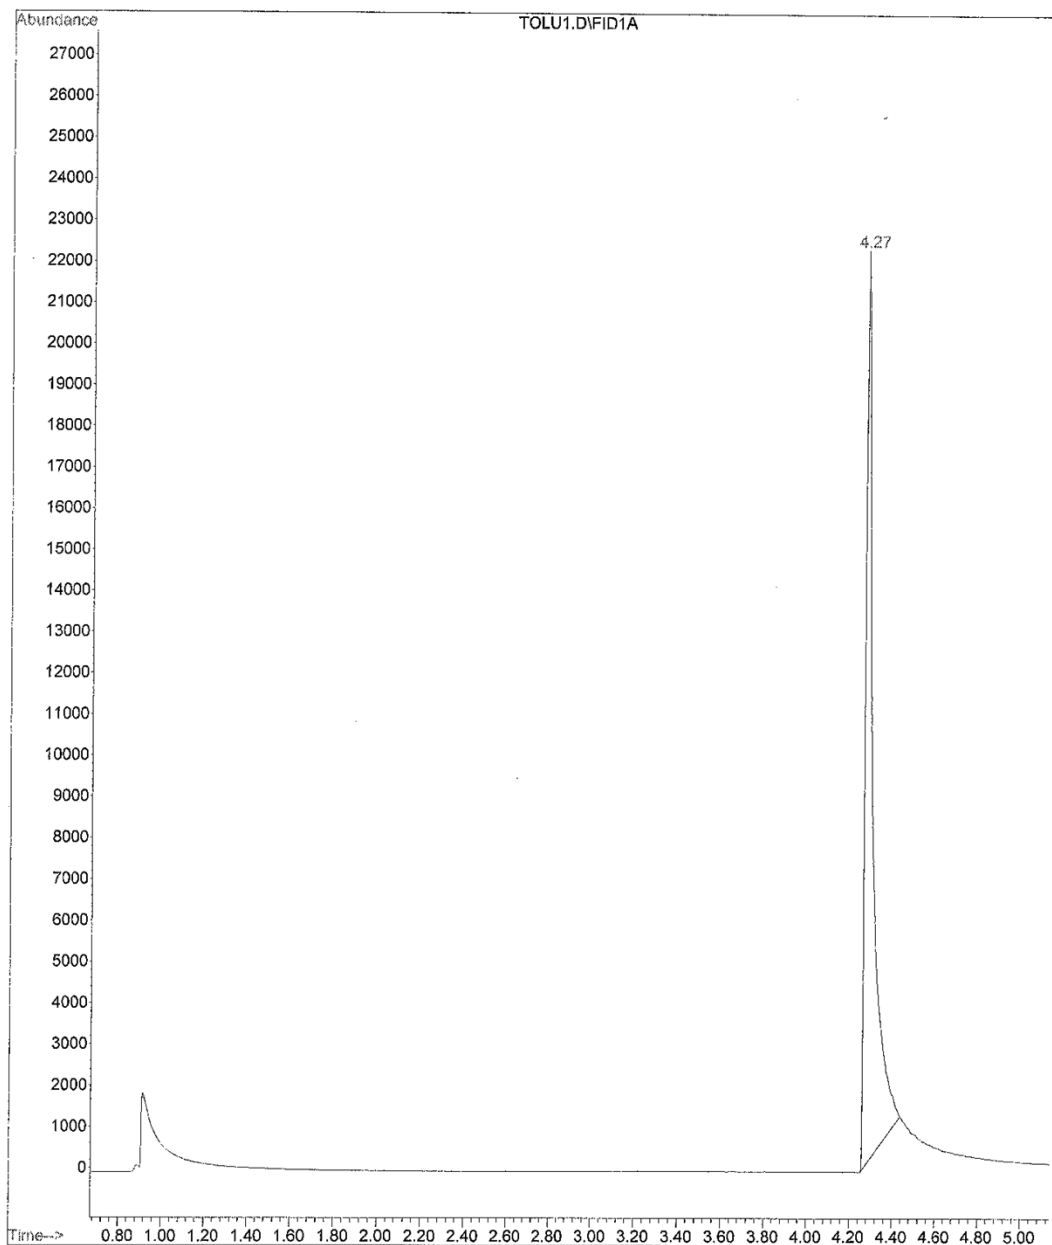

Figure S.4 – GC chromatograph of toluene from **1** using 100µm PDMS SPME fiber from TGA exhaust

TOLU1.D\FID1A

| Peak# | Ret. Time | Type | Width | Area   | Start Time | End Time |
|-------|-----------|------|-------|--------|------------|----------|
| 1     | 4.272     | BB   | 0.035 | 555187 | 4.250      | 4.437    |
| 2     | 7.184     | BV   | 0.006 | 103424 | 7.167      | 7.194    |

Figure S.4.1 – Peak area from Figure S.4



File : C:\HPCHEM\2\DATA\MATT\_F\04112013\TOLU2.D  
Operator : Matt  
Acquired : 11 Apr 2013 20:37 using AcqMethod MATT\_F2.M  
Instrument : HP5890  
Sample Name: Toluene in Methanol, Ret. time check  
Misc Info : Ti=30C, 20C/min, 3m, Tf=150C, 20C/min 1.00m  
Vial Number: 1

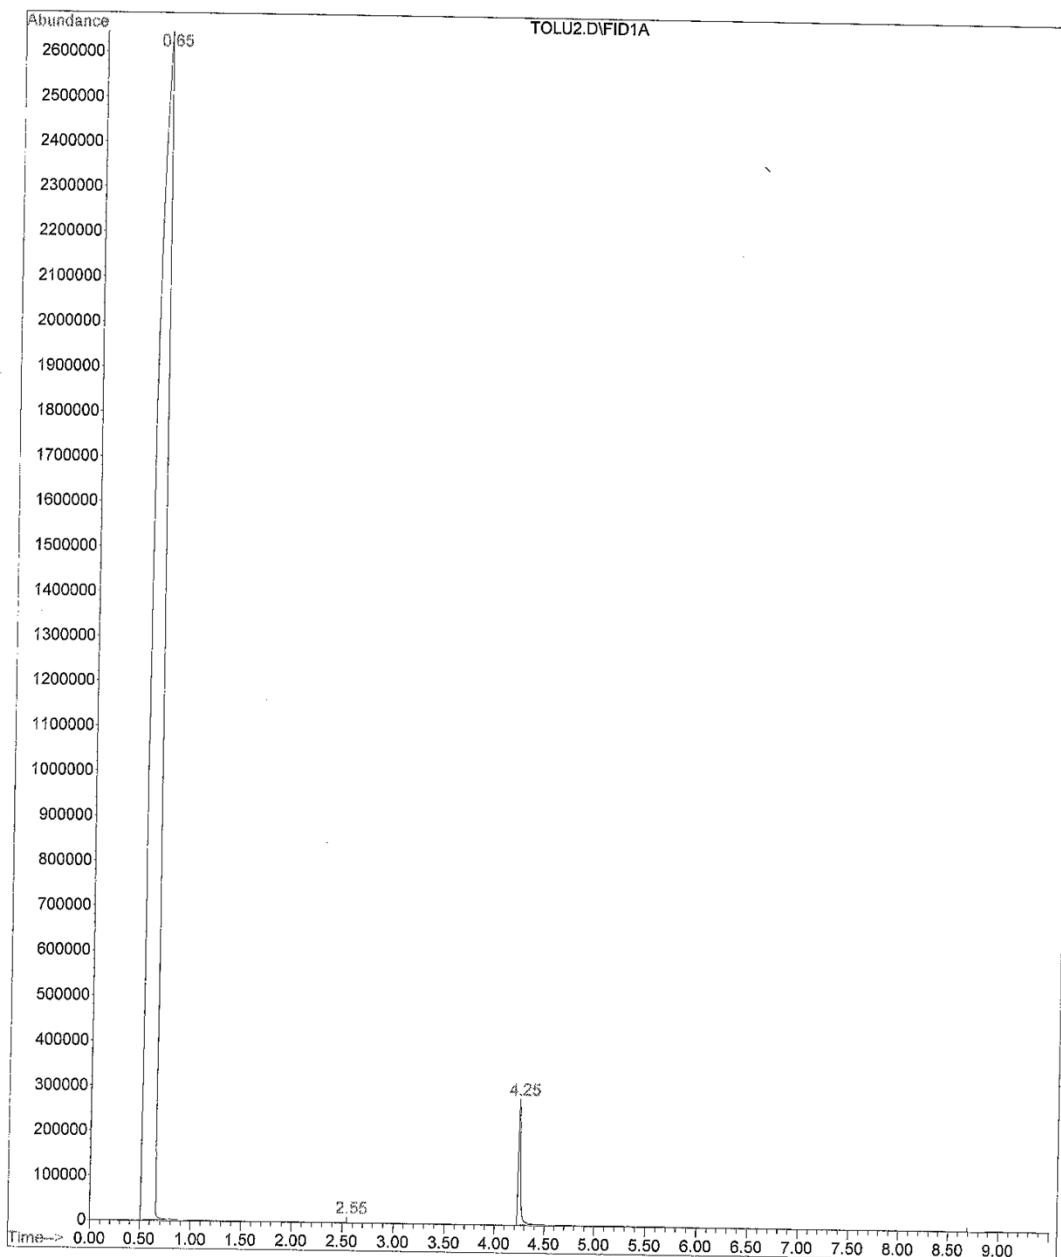

Figure S.5 – GC chromatograph of toluene in methanol solution, direct inject

TOLU2.D\FID1A

| Peak# | Ret Time | Type | Width | Area      | Start Time | End Time |
|-------|----------|------|-------|-----------|------------|----------|
| 1     | 0.647    | BV   | 0.084 | 179588773 | 0.493      | 0.782    |
| 2     | 2.548    | BB   | 0.005 | 23628     | 2.536      | 2.566    |
| 3     | 4.247    | BB   | 0.025 | 4518843   | 4.208      | 4.459    |

Figure S.5.1 – Peak area from Figure S.5

File : C:\HPCHEM\1\DATA\MATT\_F\SPMETR\STDADD\TGATOL.D  
Operator : Matt  
Acquired : 13 Jan 2014 22:18 using AcqMethod MATT\_F  
Instrument : CSS Instr  
Sample Name: 85umPolyacFiber,Tol,TGA off-gas, full run  
Misc Info : Ti=30,20C/min,3min,Tf=150C,20C/min,1min  
Vial Number: 1

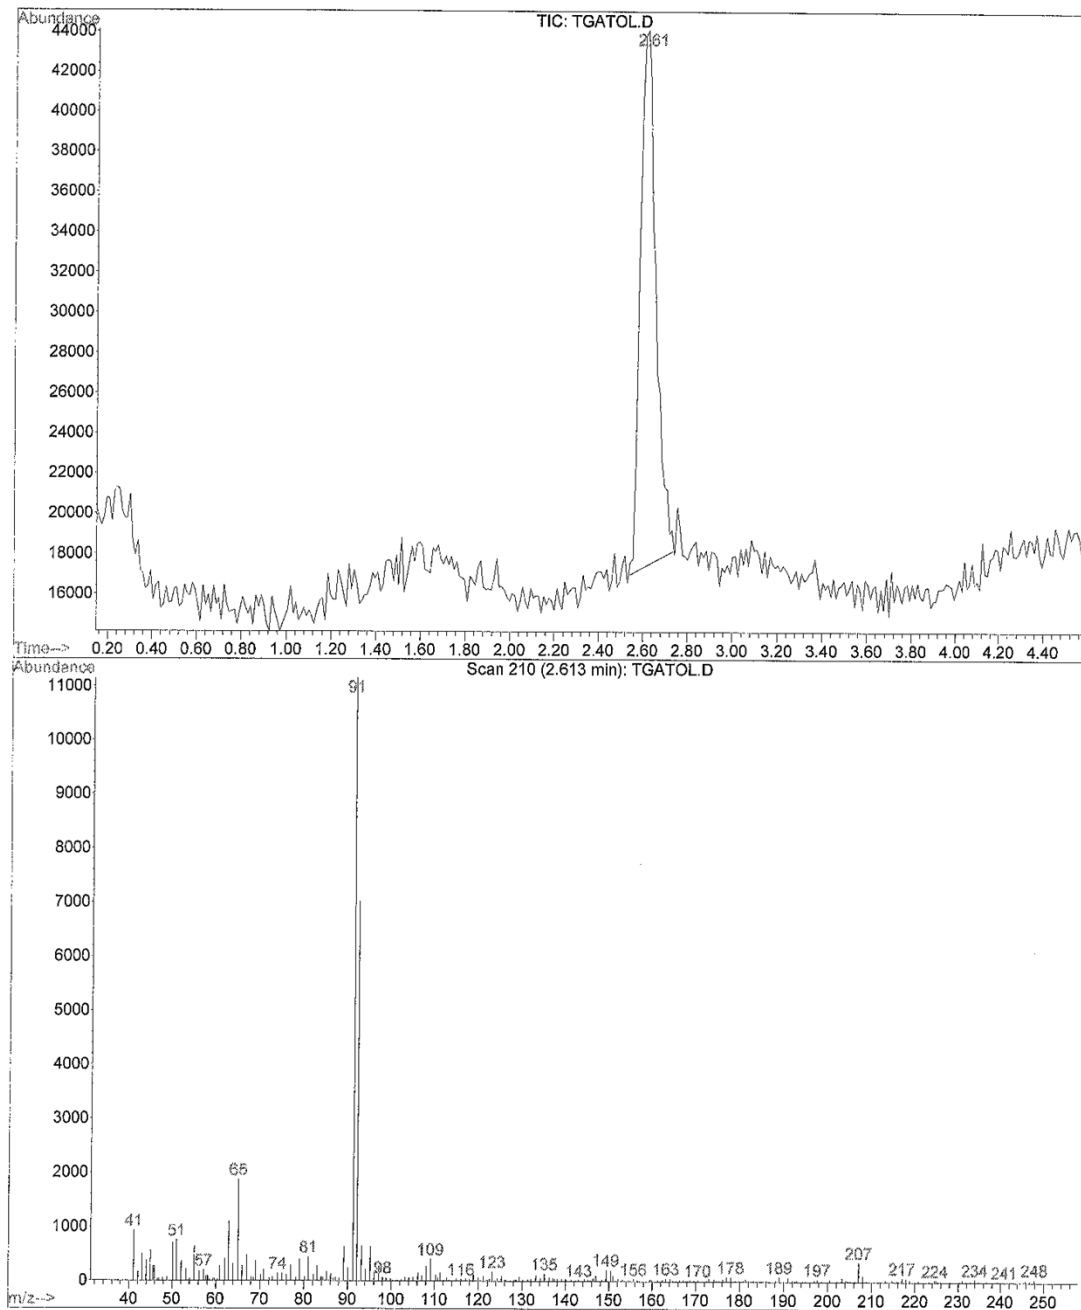

Figure S.6 – GCMS chromatograph of toluene from **1** using 85µm Polyacrylate SPME fiber from TGA exhaust

TIC: TGATOL.D

85umPolyacFiber,Tol,TGA off-gas, full run

| Peak# | Ret Time | Type | Width | Area    | Start Time | End Time |
|-------|----------|------|-------|---------|------------|----------|
| 1     | 2.614    | PV   | 0.075 | 1313133 | 2.537      | 2.745    |

Figure S.6.1 – Peak area from Figure S.6

File : C:\HPCHEM\1\DATA\MATT\_F\07012013\TOL1.D  
Operator : Matt  
Acquired : 1 Jul 2013 20:50 using AcqMethod MATT\_F  
Instrument : CSS Instr  
Sample Name: Tol Guest, DB-1 Column, SPME 7um PDMS  
Misc Info : Ti=30C, 20/min, 3min, Tf=150C, 20C/min, 1min  
Vial Number: 1

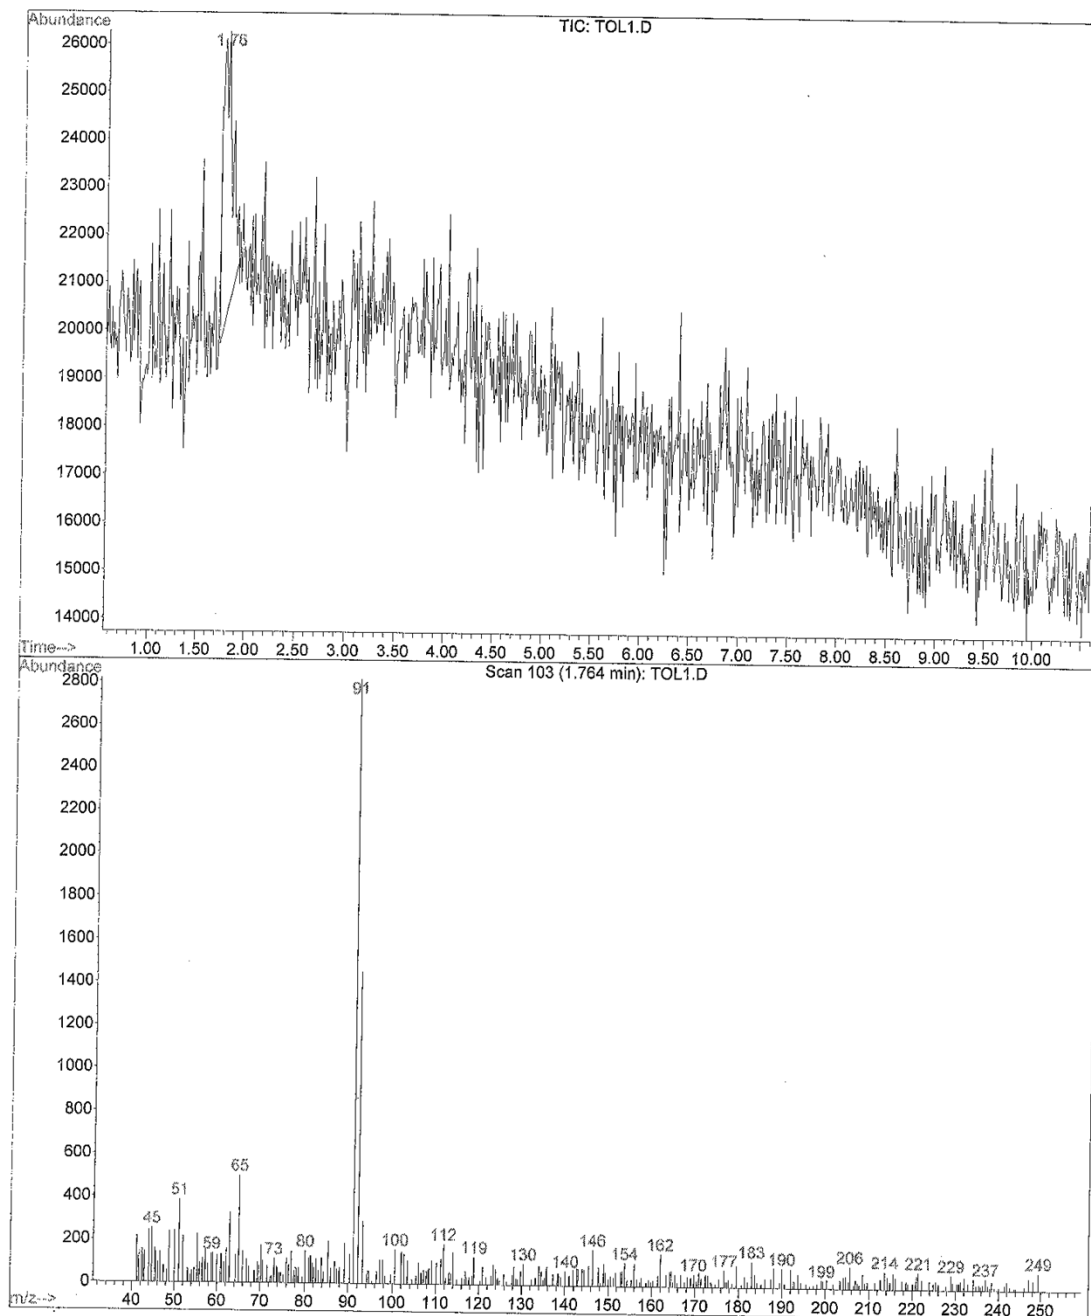

Figure S.7 – GCMS chromatograph of toluene from **1** using 7µm PDMS SPME fiber at 60°C

TIC: TOL1.D *LOC*  
Tol Guest, DB-1 Column, SPME 7um PDMS

| Peak# | Ret Time | Type | Width | Area   | Start Time | End Time |
|-------|----------|------|-------|--------|------------|----------|
| 1     | 1.762    | M    | 0.105 | 383405 | 1.727      | 1.932    |

Figure S.7.1 – Peak area from Figure S.7

File : C:\HPCHEM\1\DATA\MATT\_F\07012013\TOL2.D  
Operator : Matt  
Acquired : 1 Jul 2013 21:21 using AcqMethod MATT\_F  
Instrument : CSS Instr  
Sample Name: Tol Guest 70C, DB-1 Column, SPME 7um PDMS  
Misc Info : Ti=30C,20/min,3min,Tf=150C,20C/min, 1min  
Vial Number: 1

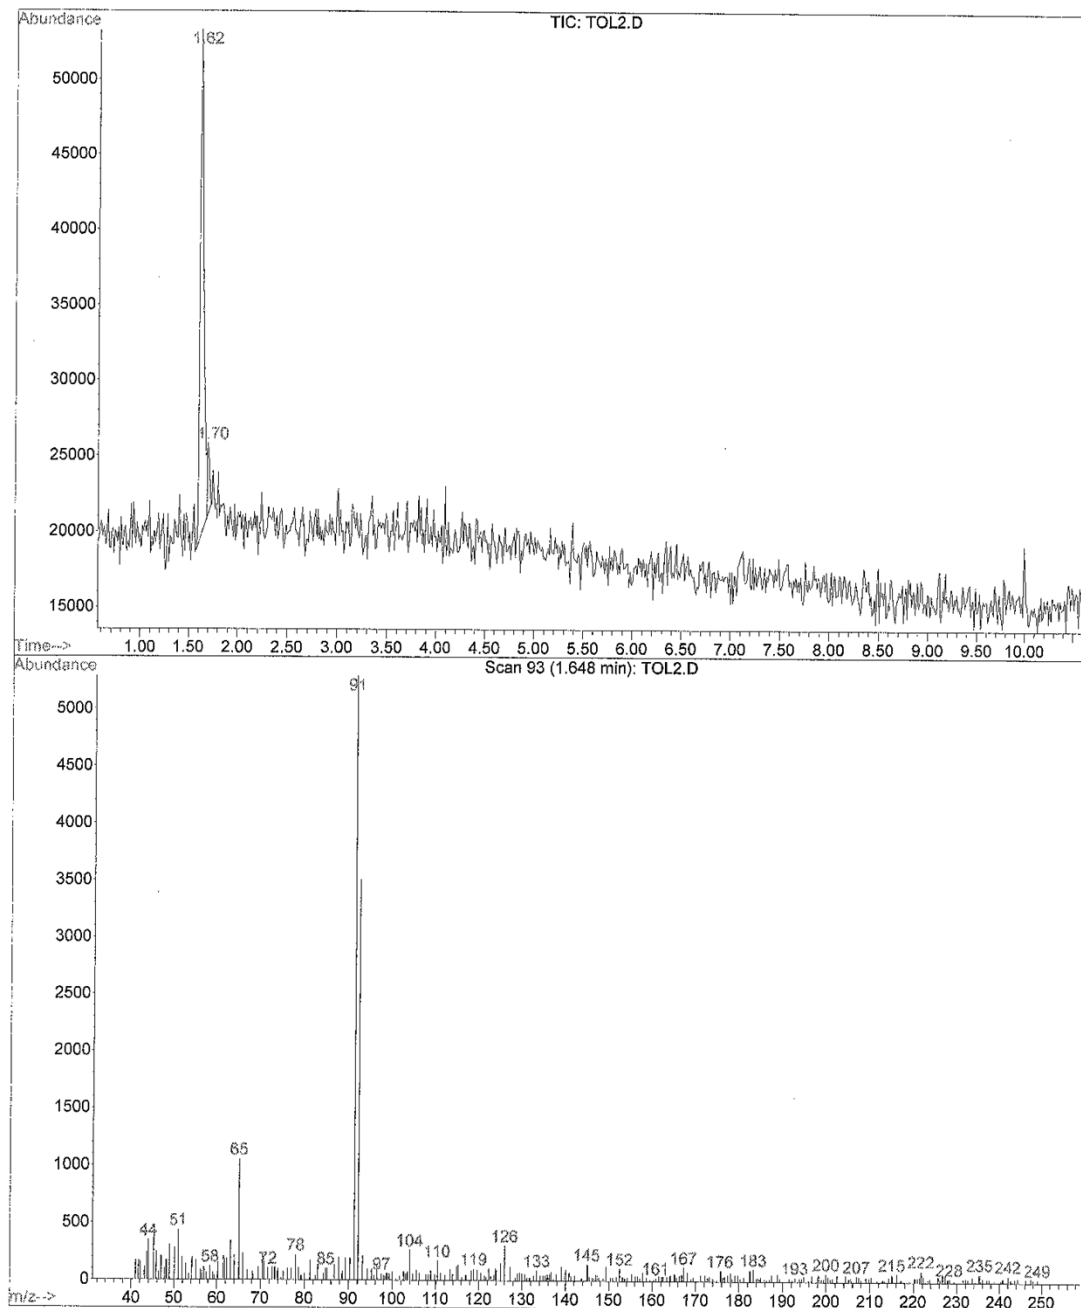

Figure S.8 – GCMS chromatograph of toluene from **1** using 7 $\mu$ m PDMS SPME fiber at 70°C

TIC: TOL2.D

Tol Guest 70C, DB-1 Column, SPME 7um PDMS

| Peak# | Ret Time | Type | Width | Area   | Start Time | End Time |
|-------|----------|------|-------|--------|------------|----------|
| 1     | 1.621    | PV   | 0.042 | 877206 | 1.576      | 1.684    |
| 2     | 1.698    | VV   | 0.030 | 83139  | 1.684      | 1.731    |

Figure S.8.1 – Peak area from Figure S.8



File : C:\HPCHEM\1\DATA\MATT\_F\SPMETR\TOL80.D  
Operator : Matt  
Acquired : 10 Jul 2013 20:40 using AcqMethod MATT\_F  
Instrument : CSS Instr  
Sample Name: DB-1 Column Tol Guest, 80C Rel SPME7umPDMS  
Misc Info : Ti=30C,3min,Tf=150C,20min  
Vial Number: 1

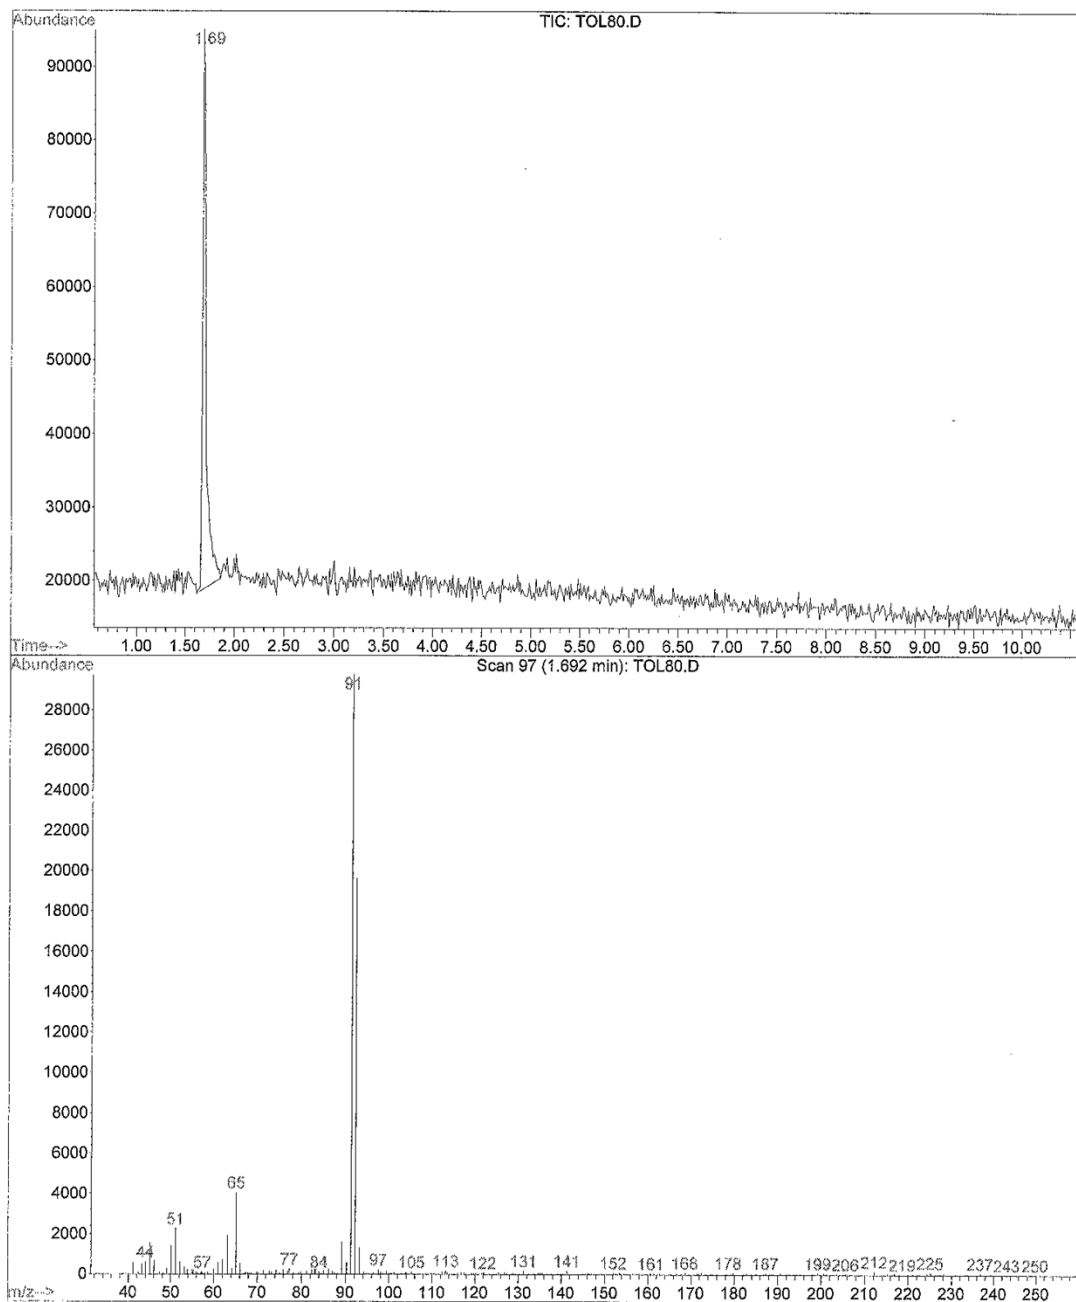

Figure S.9 – GCMS chromatograph of toluene from **1** using 7 $\mu$ m PDMS SPME fiber at 80°C

TIC: TOL80.D

DB-1 Column Tol Guest, 80C Rel SPME7umPDMS

| Peak# | Ret Time | Type | Width | Area    | Start Time | End Time |
|-------|----------|------|-------|---------|------------|----------|
| 1     | 1.691    | PV   | 0.048 | 1950212 | 1.631      | 1.865    |

Figure S.9.1 – Peak area from Figure S.9

File : C:\HPCHEM\1\DATA\MATT\_F\SPMETR\TOL90.D  
Operator : Matt  
Acquired : 10 Jul 2013 21:03 using AcqMethod MATT\_F  
Instrument : CSS Instr  
Sample Name: DB-1 Column Tol Guest, 90C Re1 SPME7umPDMS  
Misc Info : Ti=30C, 3min, Tf=150C, 20min  
Vial Number: 1

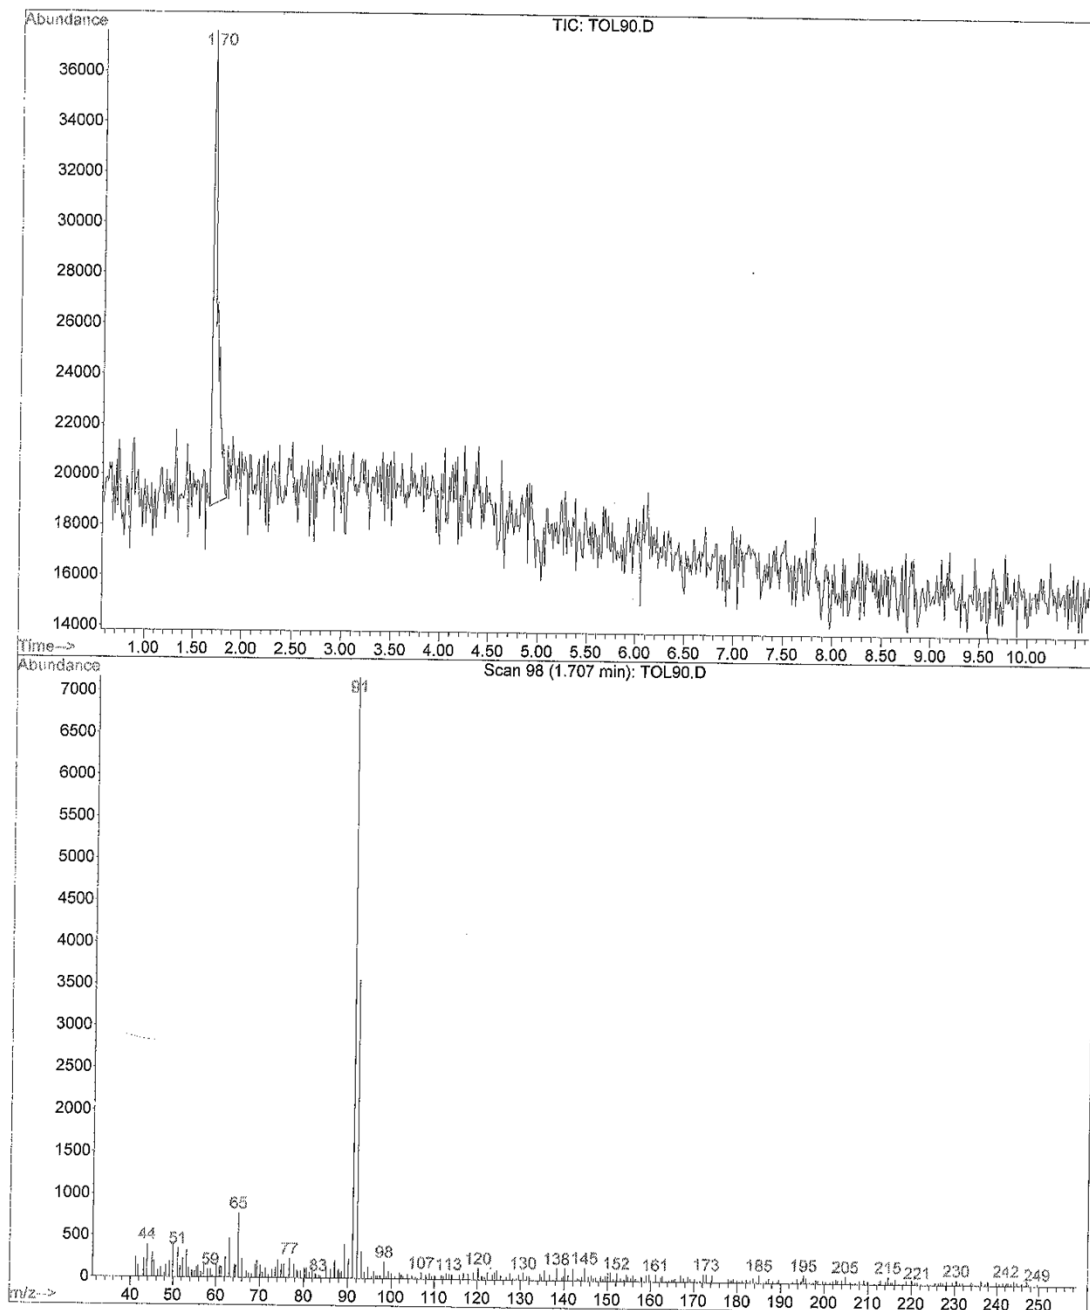

Figure S.10 - GCMS chromatograph of toluene from 1 using 7 $\mu$ m PDMS SPME fiber at 90°C

TIC: TOL90.D

DB-1 Column Tol Guest, 90C Rel SPME7umPDMS

| Peak# | Ret Time | Type | Width | Area   | Start Time | End Time |
|-------|----------|------|-------|--------|------------|----------|
| 1     | 1.700    | PV   | 0.048 | 602539 | 1.667      | 1.834    |

Figure S.10.1 – Peak area from Figure S.10

File : C:\HPCHEM\1\DATA\MATT\_F\SPMETR\TOL100.D  
Operator : Matt  
Acquired : 10 Jul 2013 21:26 using AcqMethod MATT\_F  
Instrument : CSS Instr  
Sample Name: DB-1 Column Tol Guest, 100C Rel SPME7umPDMS  
Misc Info : Ti=30C,3min,Tf=150C,20min  
Vial Number: 1

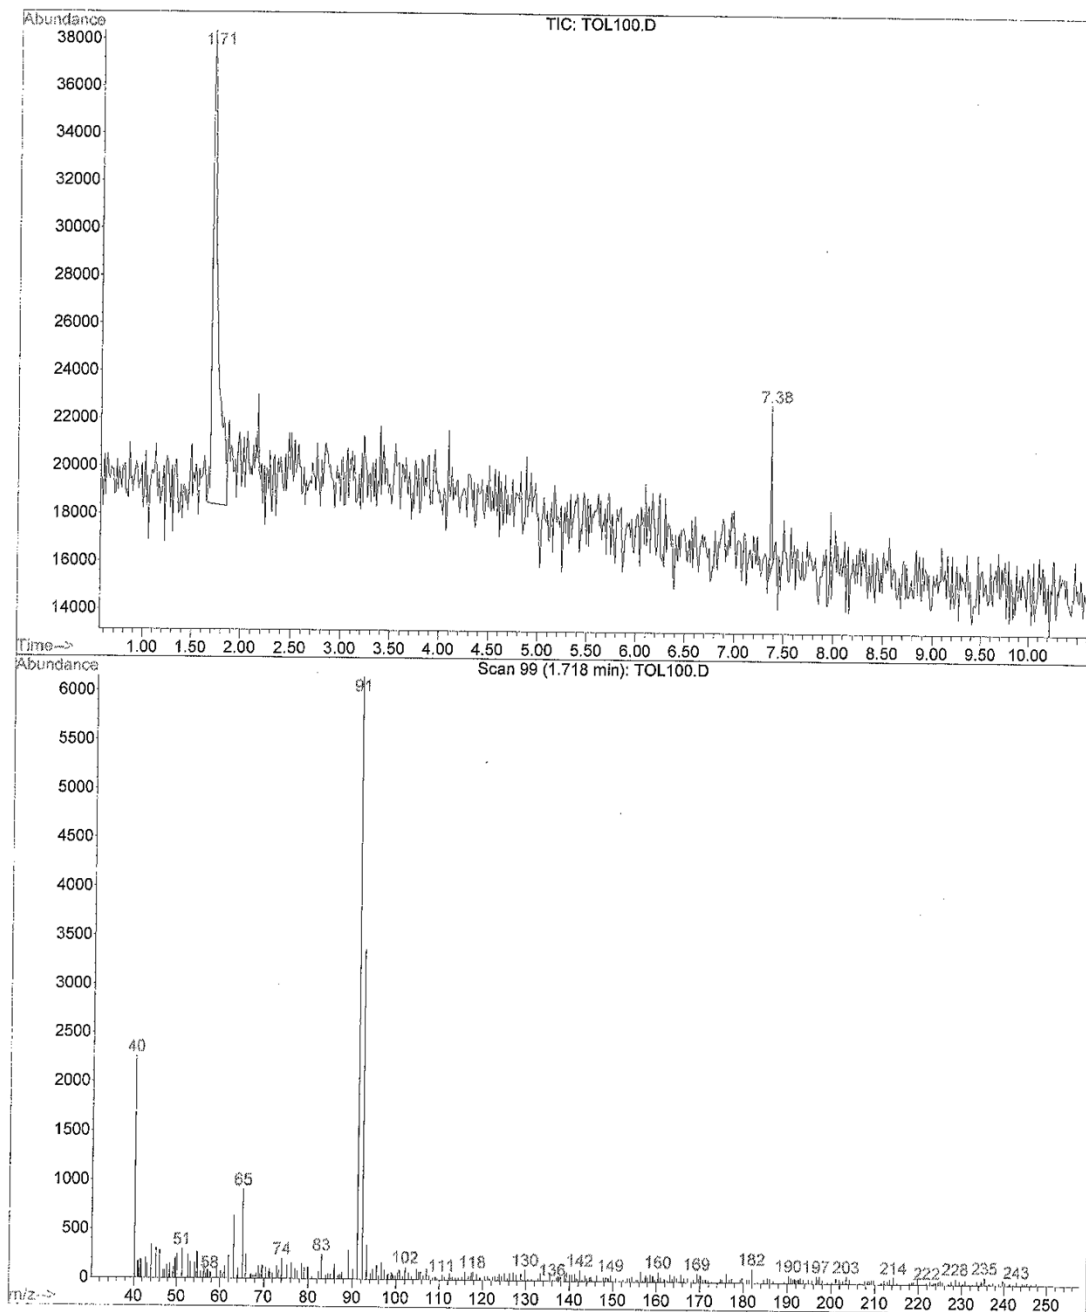

Figure S.11 – GCMS chromatograph of toluene from **1** using 7µm PDMS SPME fiber at 100°C

TIC: TOL100.D

DB-1 Column Tol Guest, 100C Re1 SPME7umPDMS

| Peak# | Ret Time | Type | Width | Area   | Start Time | End Time |
|-------|----------|------|-------|--------|------------|----------|
| 1     | 1.711    | VV   | 0.056 | 779687 | 1.655      | 1.856    |
| 2     | 7.376    | PV   | 0.016 | 53002  | 7.342      | 7.398    |

Figure S.11.1 – Peak area from Figure S.11

File : C:\HPCHEM\1\DATA\MATT\_F\SPMETR\TOL110.D  
Operator : Matt  
Acquired : 10 Jul 2013 21:48 using AcqMethod MATT\_F  
Instrument : CSS Instr  
Sample Name: DB-1 Column Tol Guest, 110C Rel SPME7umPDMS  
Misc Info : Ti=30C,3min,Tf=150C,20min  
Vial Number: 1

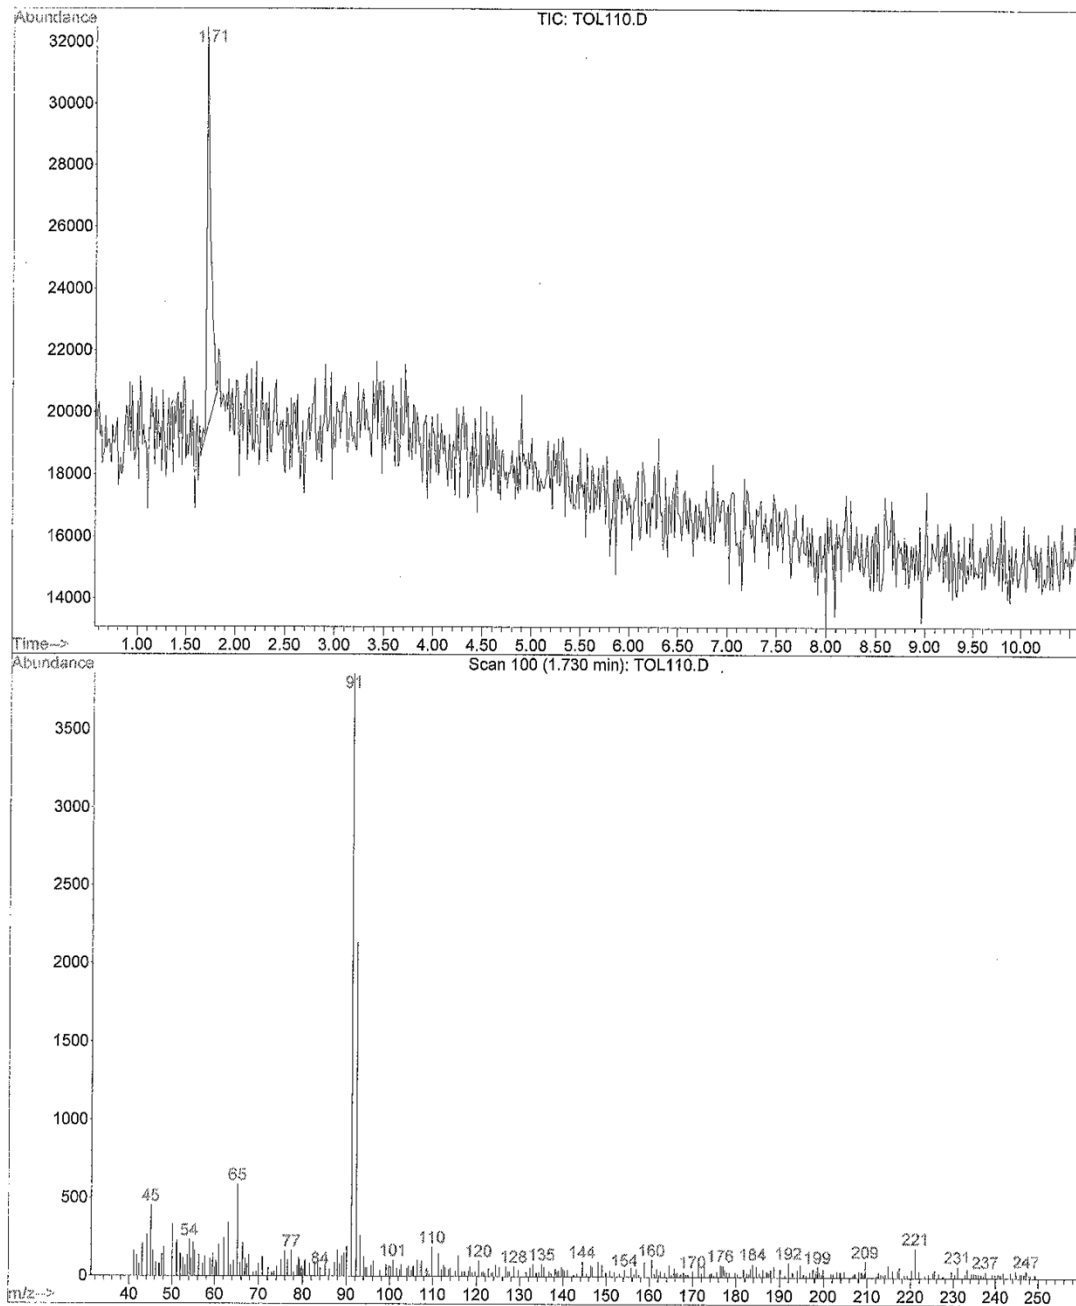

Figure S.12 – GCMS chromatograph of toluene from **1** using 7µm PDMS SPME fiber at 110°C

TIC: TOL110.D

DB-1 Column Tol Guest, 110C Rel SPME7umPDMS

| Peak# | Ret Time | Type | Width | Area   | Start Time | End Time |
|-------|----------|------|-------|--------|------------|----------|
| 1     | 1.715    | PV   | 0.050 | 326116 | 1.653      | 1.813    |

Figure S.12.1 – Peak area from Figure S.12



File : C:\HPCHEM\1\DATA\MATT\_F\SPMETR\TOL120.D  
Operator : Matt  
Acquired : 5 Dec 2013 21:17 using AcqMethod MATT\_F  
Instrument : CSS Instr  
Sample Name: 7umPDMS SPME, HP1Col, 120C  
Misc Info : ti=30C, 20C/min, 3min, Tf=150C, 20C/min, 1min  
Vial Number: 1

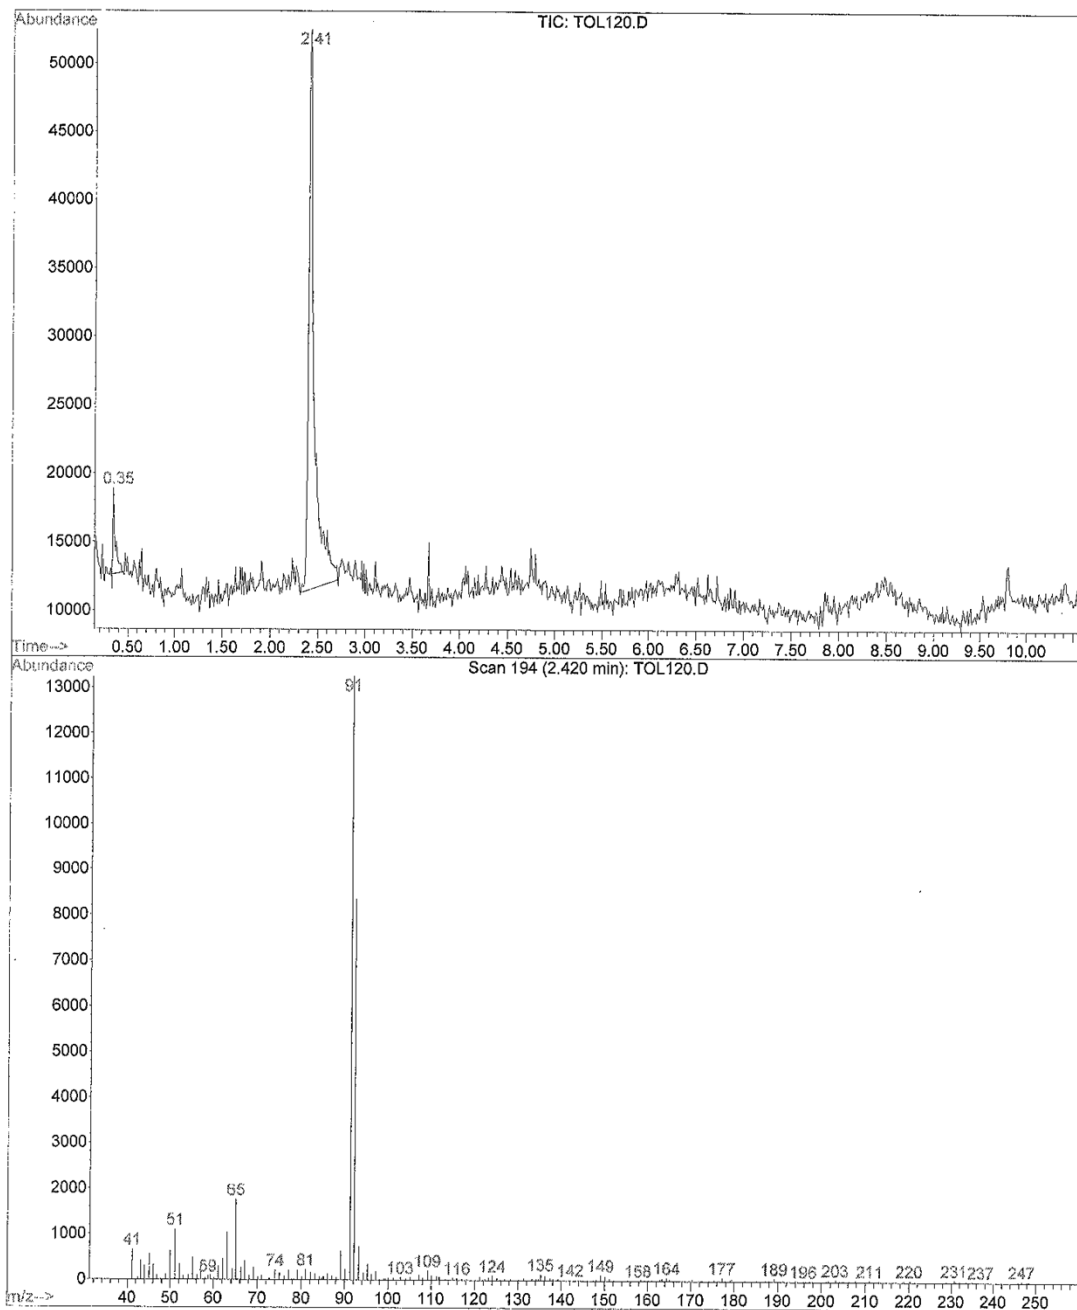

Figure S.13 – GCMS chromatograph of toluene from **1** using 7µm PDMS SPME fiber at 120°C

TIC: TOL120.D

7umPDMS SPME,HP1Col, 120C

| Peak# | Ret Time | Type | Width | Area    | Start Time | End Time |
|-------|----------|------|-------|---------|------------|----------|
| 1     | 0.348    | PV   | 0.033 | 111112  | 0.297      | 0.454    |
| 2     | 2.410    | PV   | 0.059 | 1712765 | 2.322      | 2.716    |

Figure S.13.1 – Peak area from Figure S.13

File : C:\HPCHEM\1\DATA\MATT\_F\SPMETR\TOL110TD.D  
Operator : Matt  
Acquired : 10 Dec 2013 21:47 using AcqMethod MATT\_F  
Instrument : CSS Instr  
Sample Name: SPME, 7umPDMS, HP-1Column, Tol guest, 110C timed  
Misc Info : ti=30C, 20C/min, 3min, tf=150C, 20C/min, 1min  
Vial Number: 1

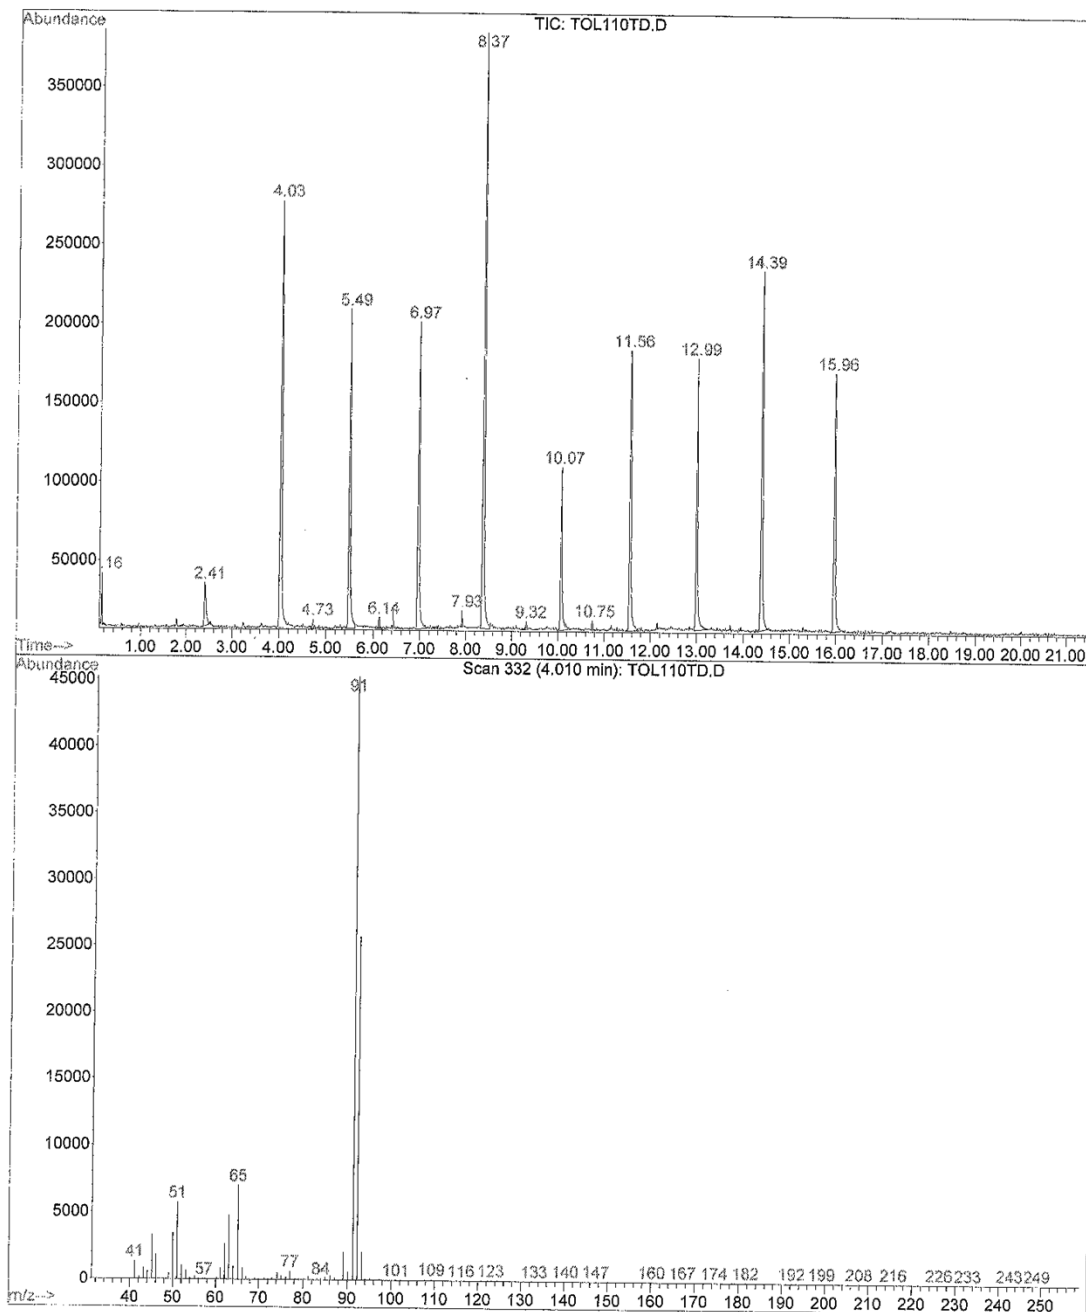

Figure S.14 – GCMS chromatograph of toluene from **1** using gas-tight syringe, sampled every 60s at 110°C

TIC: TOL110TD.D

SPME, 7umPDMS, HP-1Column, Tol guest, 110CTimed

| Peak# | Ret Time | Type | Width | Area    | Start Time | End Time |
|-------|----------|------|-------|---------|------------|----------|
| 1     | 0.161    | BV   | 0.023 | 368440  | 0.120      | 0.264    |
| 2     | 2.414    | PV   | 0.040 | 734970  | 2.363      | 2.507    |
| 3     | 4.031    | PV   | 0.038 | 6336325 | 3.952      | 4.338    |
| 4     | 4.731    | VV   | 0.025 | 84523   | 4.690      | 4.755    |
| 5     | 5.485    | VV   | 0.036 | 4683424 | 5.403      | 5.611    |
| 6     | 6.135    | VV   | 0.036 | 149385  | 6.051      | 6.200    |
| 7     | 6.967    | PV   | 0.037 | 4315510 | 6.914      | 7.161    |
| 8     | 7.926    | PV   | 0.031 | 128650  | 7.748      | 7.951    |
| 9     | 8.370    | VV   | 0.035 | 8186782 | 8.317      | 8.530    |
| 10    | 9.323    | PV   | 0.035 | 113959  | 9.207      | 9.354    |
| 11    | 10.071   | PV   | 0.038 | 2483174 | 10.002     | 10.325   |
| 12    | 10.753   | VV   | 0.027 | 96317   | 10.725     | 10.835   |
| 13    | 11.558   | PV   | 0.037 | 4255166 | 11.467     | 11.793   |
| 14    | 12.993   | PV   | 0.037 | 3837816 | 12.948     | 13.257   |
| 15    | 14.385   | PV   | 0.036 | 4949555 | 14.302     | 14.534   |
| 16    | 15.964   | PV   | 0.036 | 3824192 | 15.883     | 16.128   |

Figure S.14.1 – Peak area from Figure S.14

File : C:\HPCHEM\1\DATA\MATT\_F\SPMETR\TOL2MIN.D  
Operator : Matt  
Acquired : 10 Dec 2013 22:19 using AcqMethod MATT\_F  
Instrument : CSS Instr  
Sample Name: SPME, 7umPDMS, HP-1Column, Tol guest, 110C, 2min  
Misc Info : ti=30C, 20C/min, 3min, tf=150C, 20C/min, 1min  
Vial Number: 1

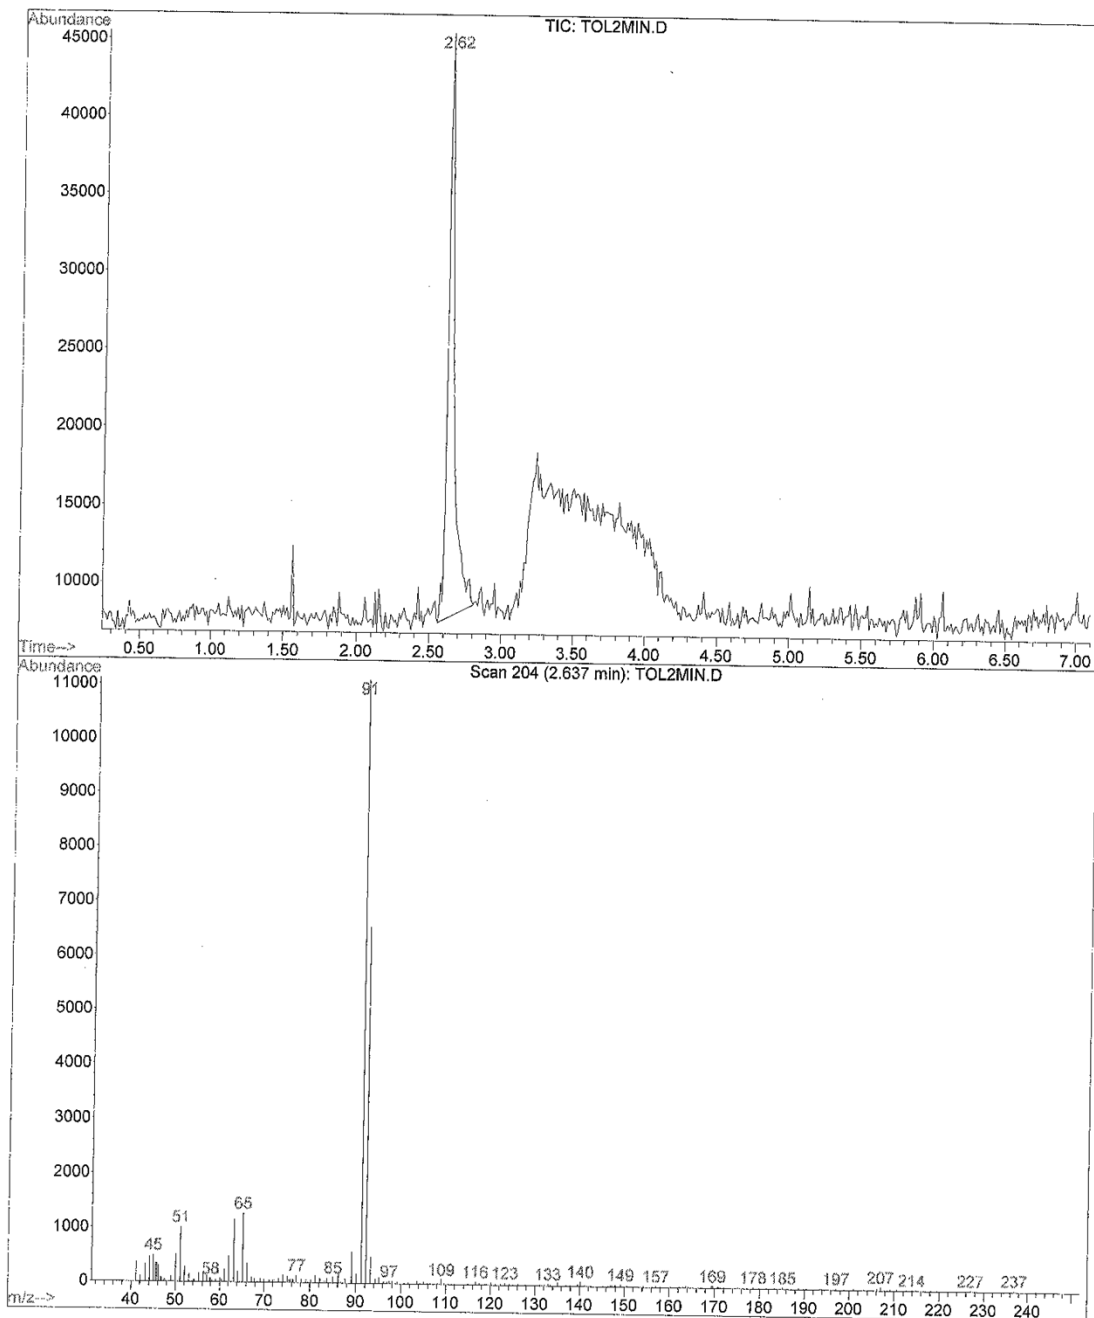

Figure S.15 – GCMS chromatograph of toluene from **1** using 7µm PDMS SPME fiber at 120°C, 2 mins

TIC: TOL2MIN.D

SPME, 7umPDMS, HP-1Column, Tol guest, 110C, 2min

| Peak# | Ret Time | Type | Width | Area    | Start Time | End Time |
|-------|----------|------|-------|---------|------------|----------|
| 1     | 2.624    | M    | 0.053 | 1192563 | 2.559      | 2.808    |

Figure S.15.1 – Peak area from Figure S.15

File : C:\HPCHEM\1\DATA\MATT\_F\SPMETR\TOL110P.D  
Operator : Matt  
Acquired : 10 Dec 2013 20:59 using AcqMethod MATT\_F  
Instrument : CSS Instr  
Sample Name: SPME, 7µmPDMS, HP-1Column, Tol guest, 110C PP  
Misc Info : ti=30C, 20C/min, 3min, tf=150C, 20C/min, 1min  
Vial Number: 1

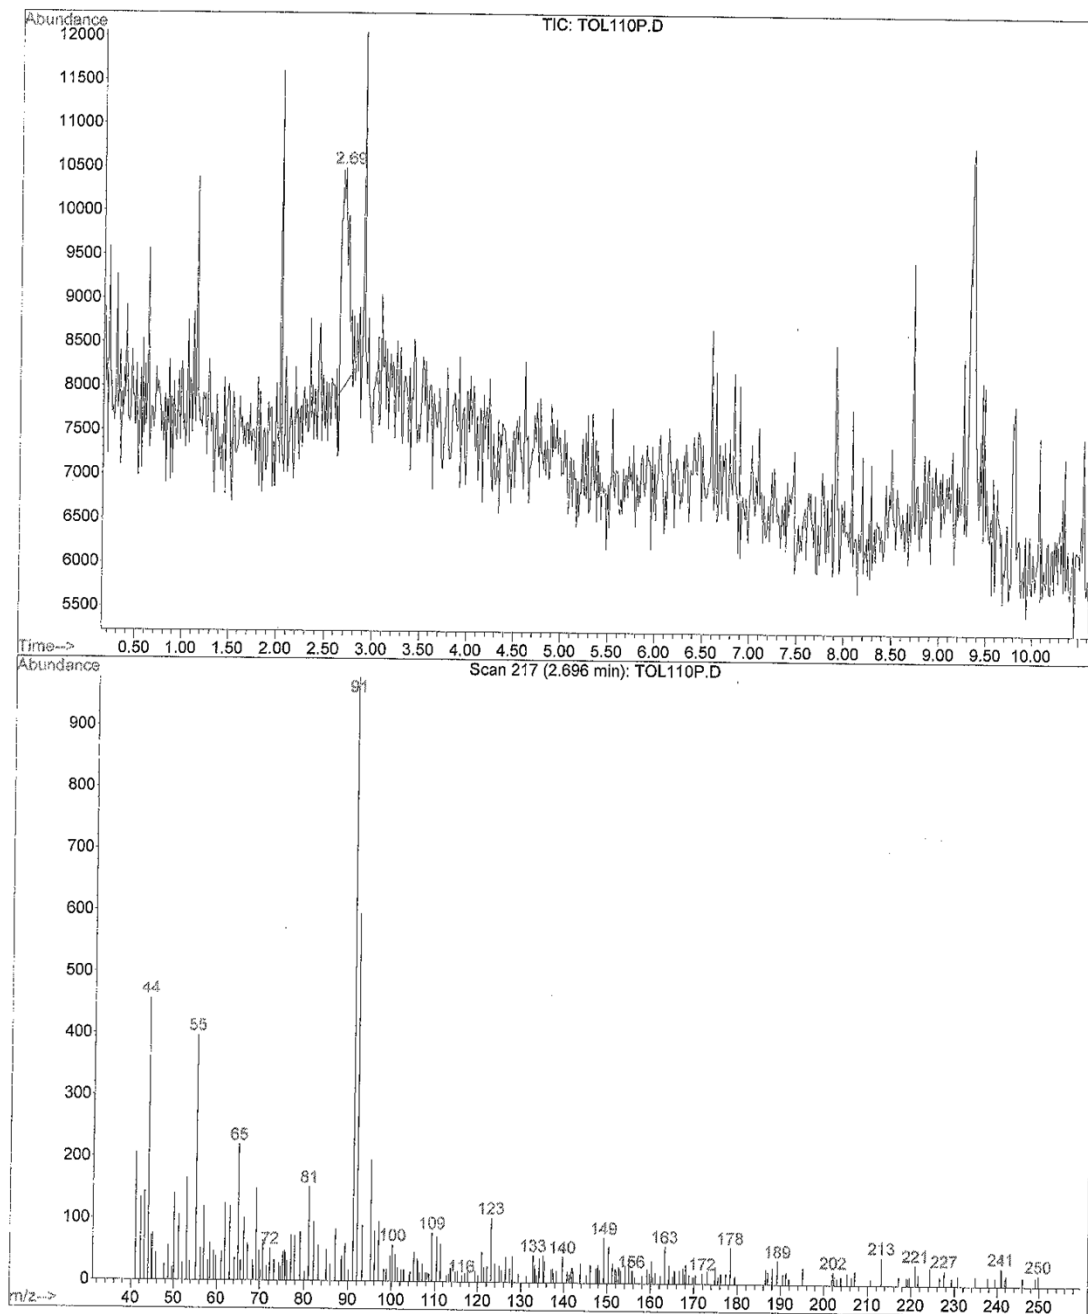

Figure S.16 - GCMS chromatograph of toluene from 1 using 7µm PDMS SPME fiber at 110°C, post-purge

TIC: TOL110P.D

SPME, 7umPDMS, HP-1Column, Tol guest, 110C PP

| Peak# | Ret Time | Type | Width | Area   | Start Time | End Time |
|-------|----------|------|-------|--------|------------|----------|
| 1     | 2.694    | M    | 0.085 | 126836 | 2.628      | 2.780    |

Figure S.16.1 – Peak area from Figure S.16



File : C:\HPCHEM\1\DATA\MATT\_F\SPMETR\STDADD\TGA100.D  
Operator : Matt  
Acquired : 13 Jan 2014 21:04 using AcqMethod MATT\_F  
Instrument : CSS Instr  
Sample Name: 85umPolyacFiber,Tol,TGA off-gas@100C  
Misc Info : Ti=30,20C/min,3min,Tf=150C,20C/min,1min  
Vial Number: 1

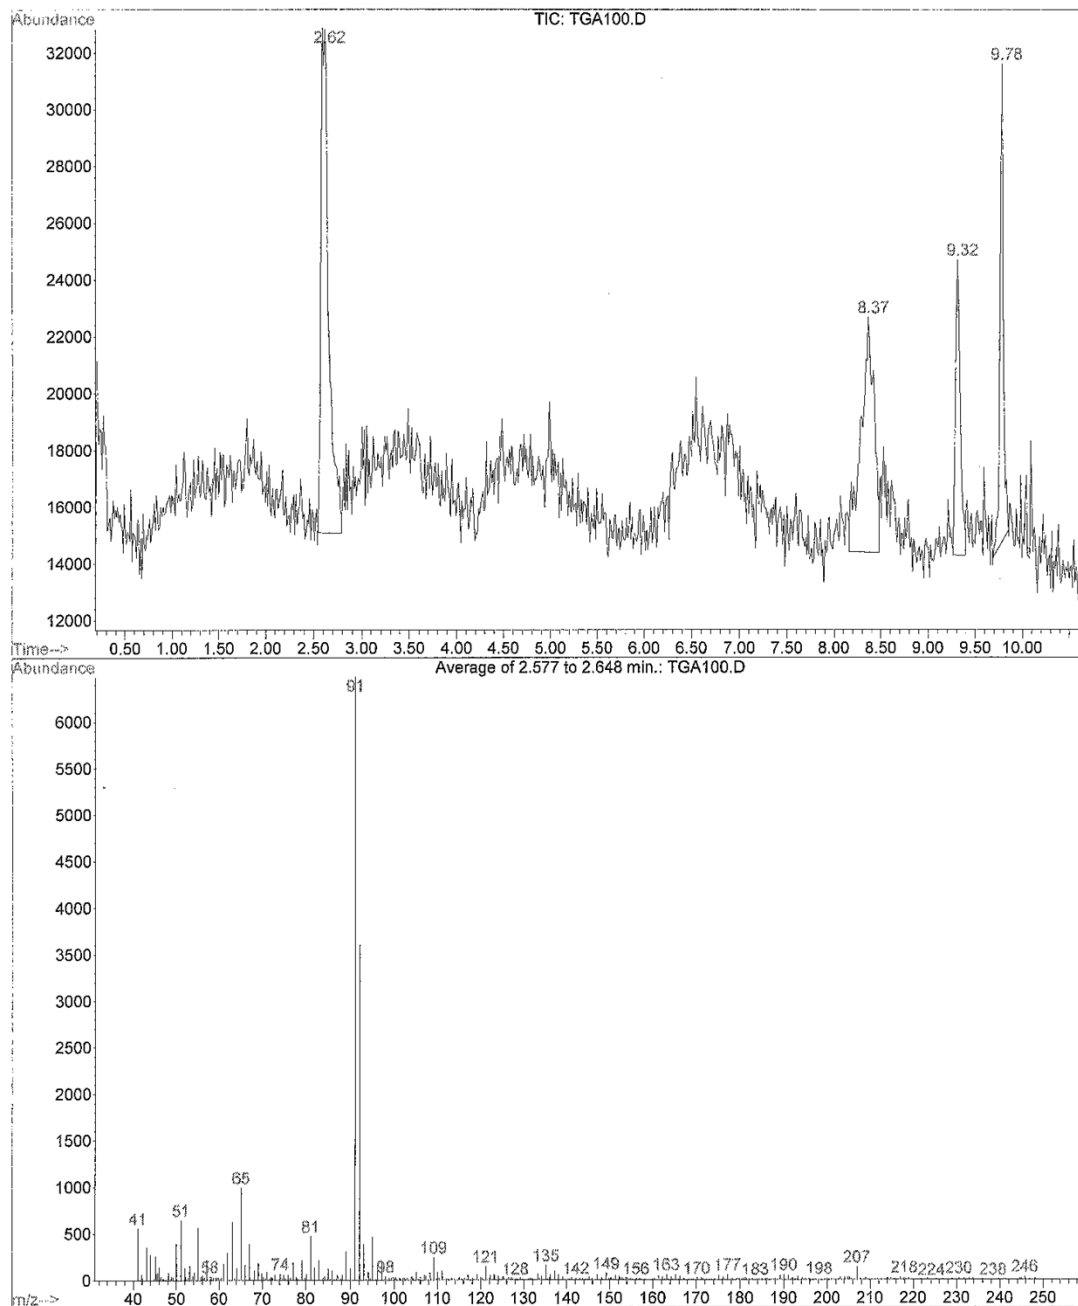

Figure S.17 - GCMS chromatograph of toluene from 1, TGA off-gas using 85µm PA SPME fiber at 100°C

TIC: TGA100.D

85umPolyacFiber,Tol,TGA off-gas@100C

| Peak# | Ret Time | Type | Width | Area    | Start Time | End Time |
|-------|----------|------|-------|---------|------------|----------|
| 1     | 2.619    | PV   | 0.086 | 1004544 | 2.547      | 2.791    |
| 2     | 8.371    | VV   | 0.123 | 802132  | 8.164      | 8.481    |
| 3     | 9.315    | VV   | 0.057 | 369409  | 9.260      | 9.394    |
| 4     | 9.782    | PV   | 0.041 | 411331  | 9.693      | 9.856    |

Figure S.17.1 – Peak area from Figure S.17

File : C:\HPCHEM\1\DATA\MATT\_F\SPMETR\STDADD\TGA110.D  
Operator : Matt  
Acquired : 13 Jan 2014 20:31 using AcqMethod MATT\_F  
Instrument : CSS Instr  
Sample Name: 85umPolyacFiber,Tol,TGA off-gas@110C  
Misc Info : Ti=30,20C/min,3min,Tf=150C,20C/min,1min  
Vial Number: 1

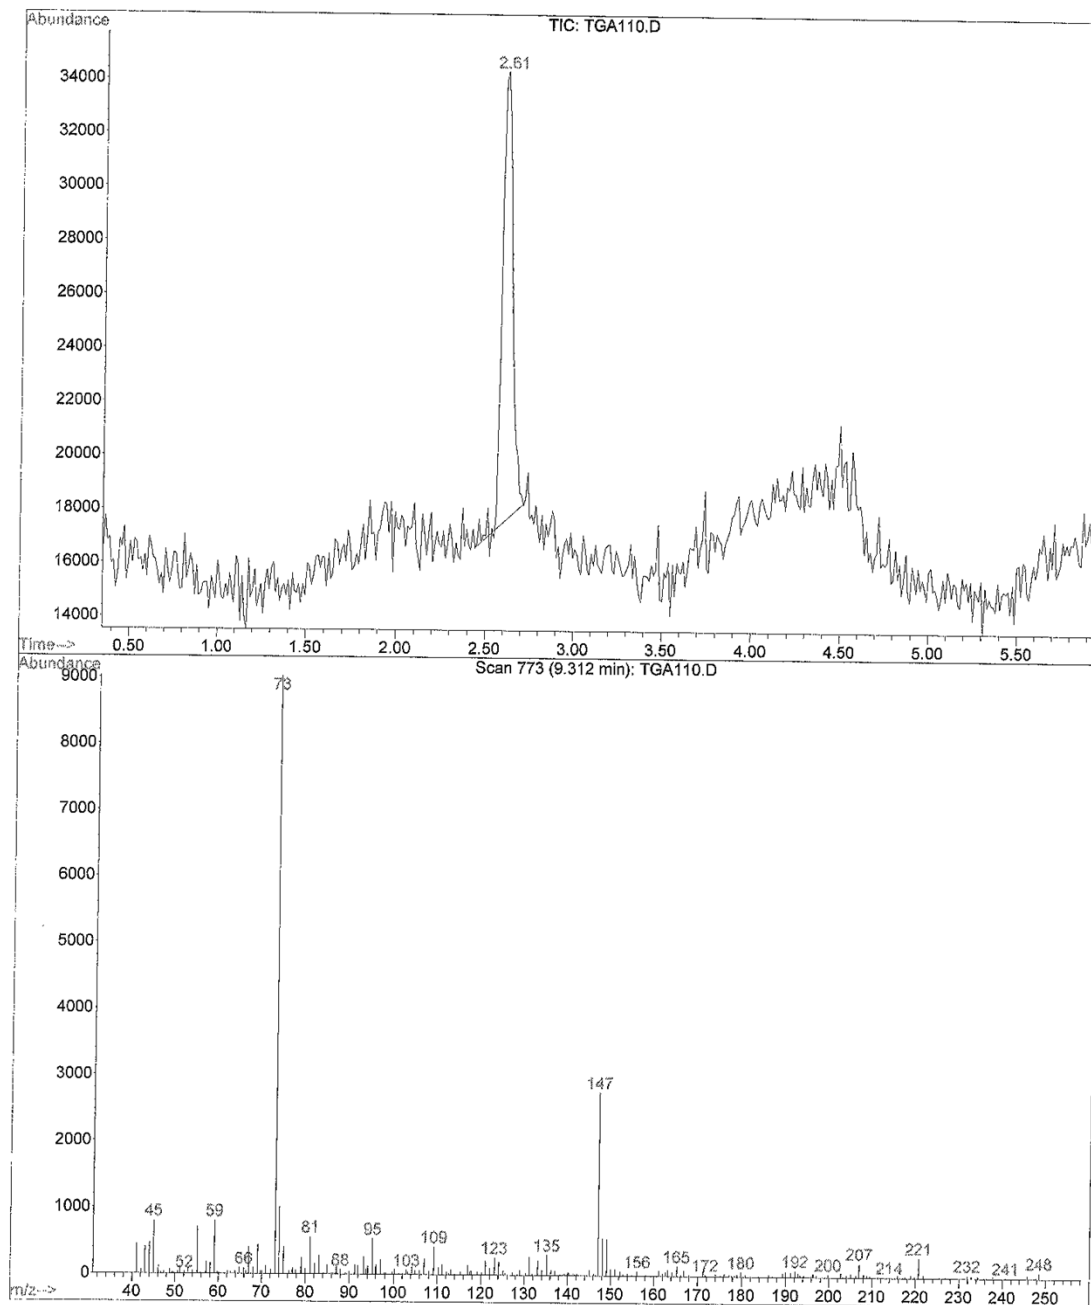

Figure S.18 - GCMS chromatograph of toluene from 1, TGA off-gas using 85µm PA SPME fiber at 110°C

TIC: TGA110.D

85umPolyacFiber,Tol,TGA off-gas@110C

| Peak# | Ret Time | Type | Width | Area   | Start Time | End Time |
|-------|----------|------|-------|--------|------------|----------|
| 1     | 2.607    | PV   | 0.065 | 679366 | 2.549      | 2.718    |

Figure S.18.1 – Peak area from Figure S.18

File : C:\HPCHEM\1\DATA\MATT\_F\SPMETR\STDADD\TGA120.D  
Operator : Matt  
Acquired : 13 Jan 2014 19:49 using AcqMethod MATT\_F  
Instrument : CSS Instr  
Sample Name: 85umPolyacFiber,Tol,TGA off-gas@120C  
Misc Info : Ti=30,20C/min,3min,Tf=150C,20C/min,1min  
Vial Number: 1

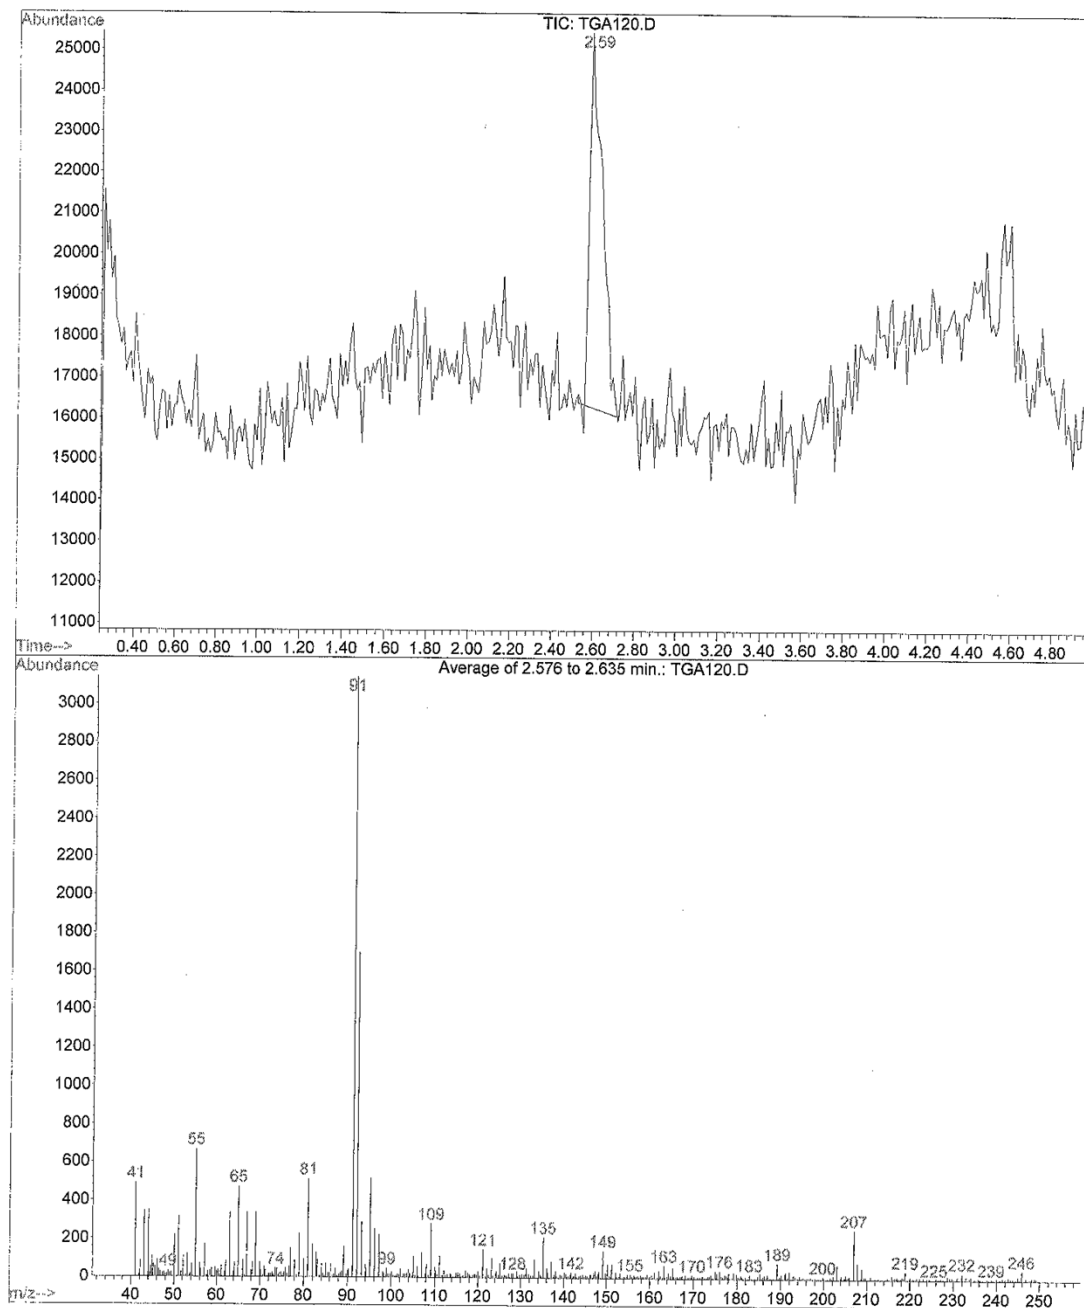

Figure S.19 - GCMS chromatograph of toluene from 1, TGA off-gas using 85µm PA SPME fiber at 120°C

TIC: TGA120.D

85umPolyacFiber,Tol,TGA off-gas@120C

| Peak# | Ret Time | Type | Width | Area   | Start Time | End Time |
|-------|----------|------|-------|--------|------------|----------|
| 1     | 2.594    | BV   | 0.066 | 389800 | 2.525      | 2.722    |

Figure S.19.1 – Peak area from Figure S.19

File : C:\HPCHEM\1\DATA\MATT\_F\SPMETR\STDADD\TGA130.D  
Operator : Matt  
Acquired : 13 Jan 2014 19:13 using AcqMethod MATT\_F  
Instrument : CSS Instr  
Sample Name: 85umPolyacFiber,Tol,TGA off-gas@130C  
Misc Info : Ti=30,20C/min,3min,Tf=150C,20C/min,1min  
Vial Number: 1

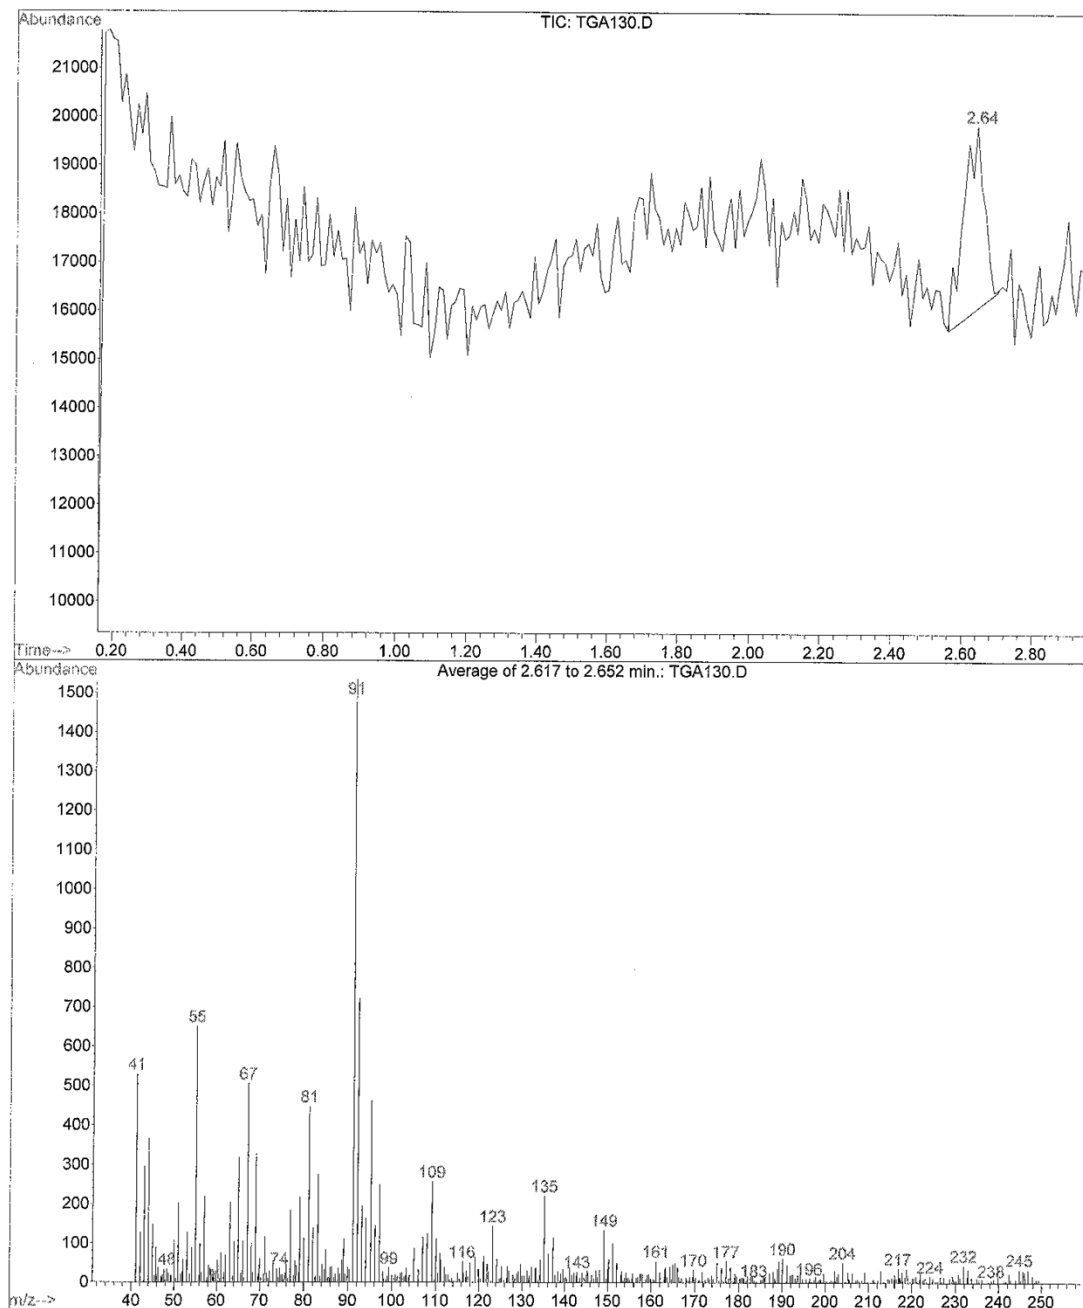

Figure S.20 – GCMS chromatograph of toluene from **1**, TGA off-gas using 85µm PA SPME fiber at 130°C

TIC: TGA130.D

85umPolyacFiber,Tol,TGA off-gas@130C

| Peak# | Ret Time | Type | Width | Area   | Start Time | End Time |
|-------|----------|------|-------|--------|------------|----------|
| 1     | 2.640    | M    | 0.067 | 151190 | 2.560      | 2.699    |

Figure S.20.1 - Peak area from Figure S.20



File : C:\HPCHEM\1\DATA\MATT\_F\SPMETR\STDADD\TGA140.D  
Operator : Matt  
Acquired : 13 Jan 2014 21:44 using AcqMethod MATT\_F  
Instrument : CSS Instr  
Sample Name: 85umPolyacFiber,Tol,TGA off-gas@140C  
Misc Info : Ti=30,20C/min,3min,Tf=150C,20C/min,1min  
Vial Number: 1

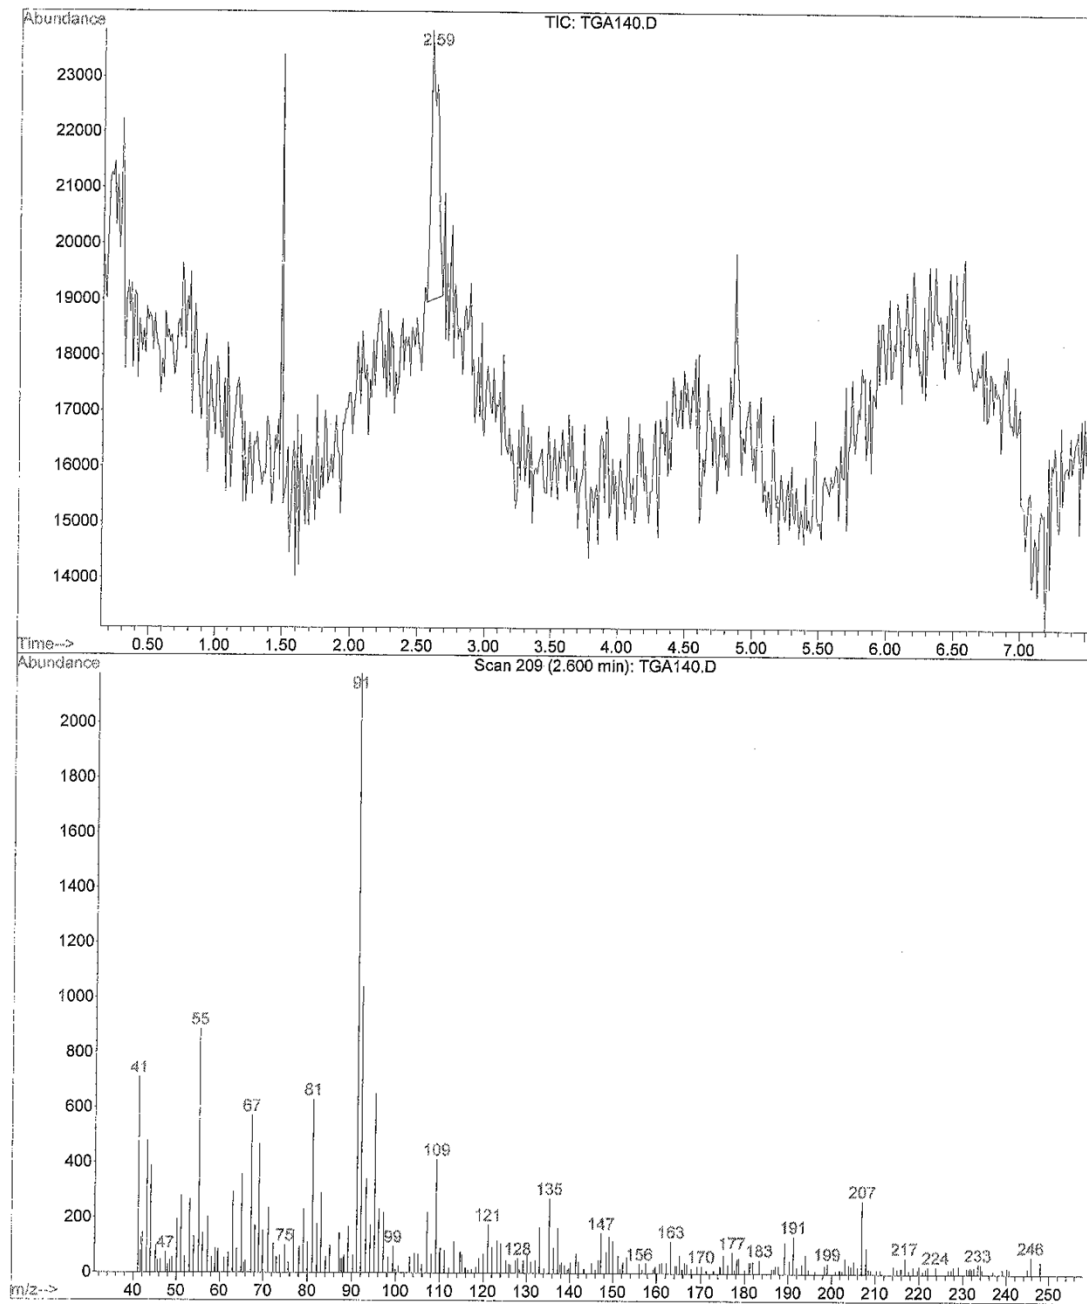

Figure S.21 - GCMS chromatograph of toluene from 1, TGA off-gas using 85µm PA SPME fiber at 140°C

TIC: TGA140.D

85umPolyacFiber,Tol,TGA off-gas@140C

| Peak# | Ret Time | Type | Width | Area   | Start Time | End Time |
|-------|----------|------|-------|--------|------------|----------|
| 1     | 2.591    | M    | 0.059 | 173877 | 2.553      | 2.671    |

Figure S.21.1 – Peak area from Figure S.21

File : C:\HPCHEM\1\DATA\MATT\_F\SPMETR\SPMEXY2.D  
Operator : Matt  
Acquired : 11 Jan 2014 10:30 using AcqMethod MATT\_F  
Instrument : CSS Instr  
Sample Name: 85umPolyacFiber,DOE16R5,TGA off-gas  
Misc Info : Ti=30,20C/min,3min,Tf=150C,20C/min,1min  
Vial Number: 1

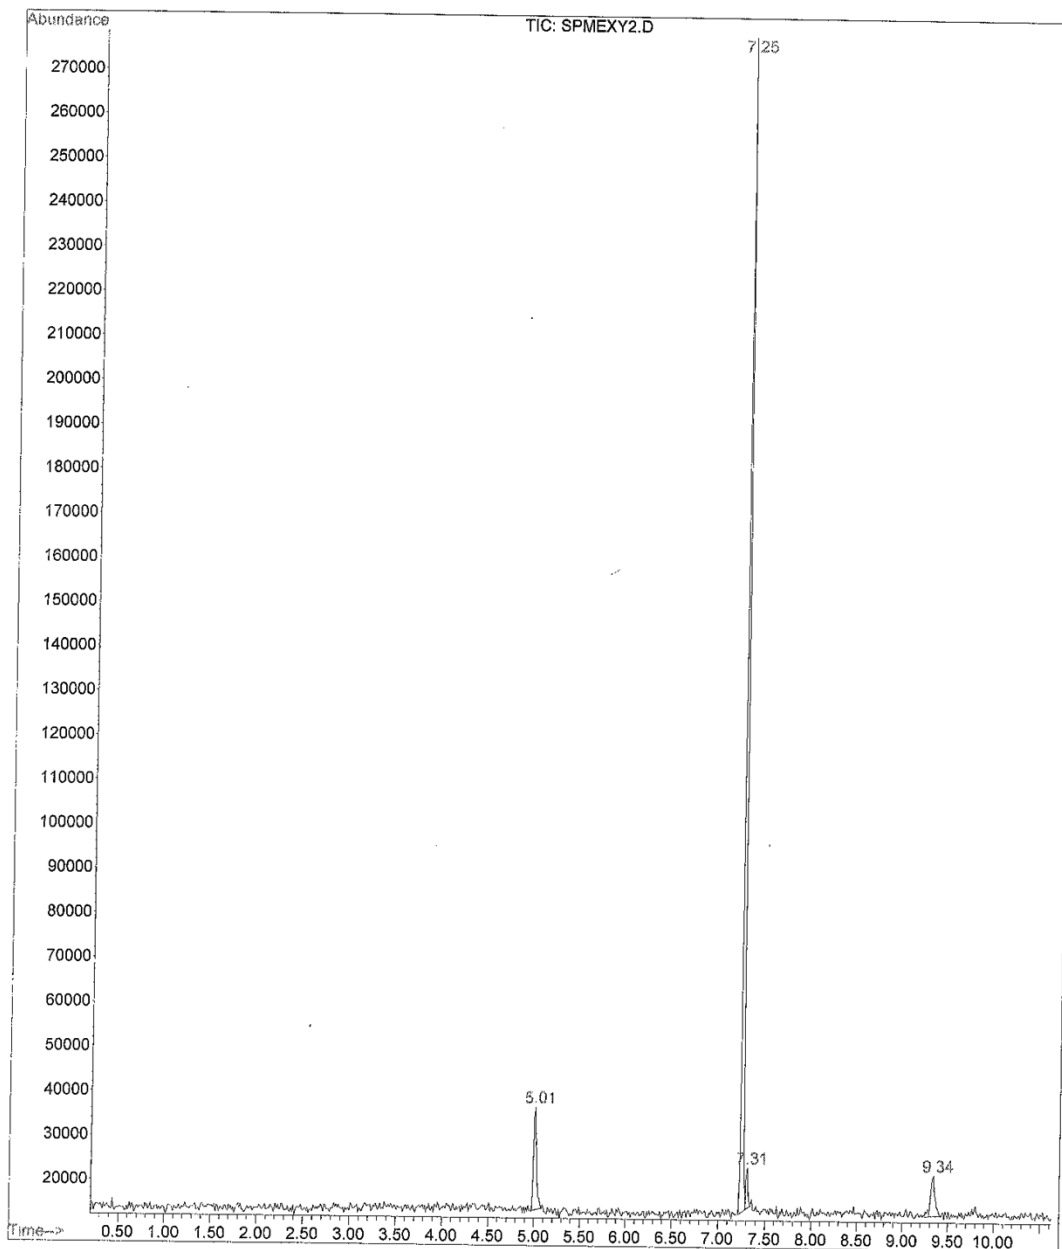

Figure S.22 - GCMS chromatograph of m-xylene and 1,3-diethylbenzene from 1 using 85µm PA SPME fiber, from TGA exhaust gas

File : C:\HPCHEM\1\DATA\MATT\_F\SPMETR\SPMEXY2.D  
Operator : Matt  
Acquired : 11 Jan 2014 10:30 using AcqMethod MATT\_F  
Instrument : CSS Instr  
Sample Name: 85umPolyacFiber, DOE16R5, TGA off-gas  
Misc Info : Ti=30, 20C/min, 3min, Tf=150C, 20C/min, 1min  
Vial Number: 1

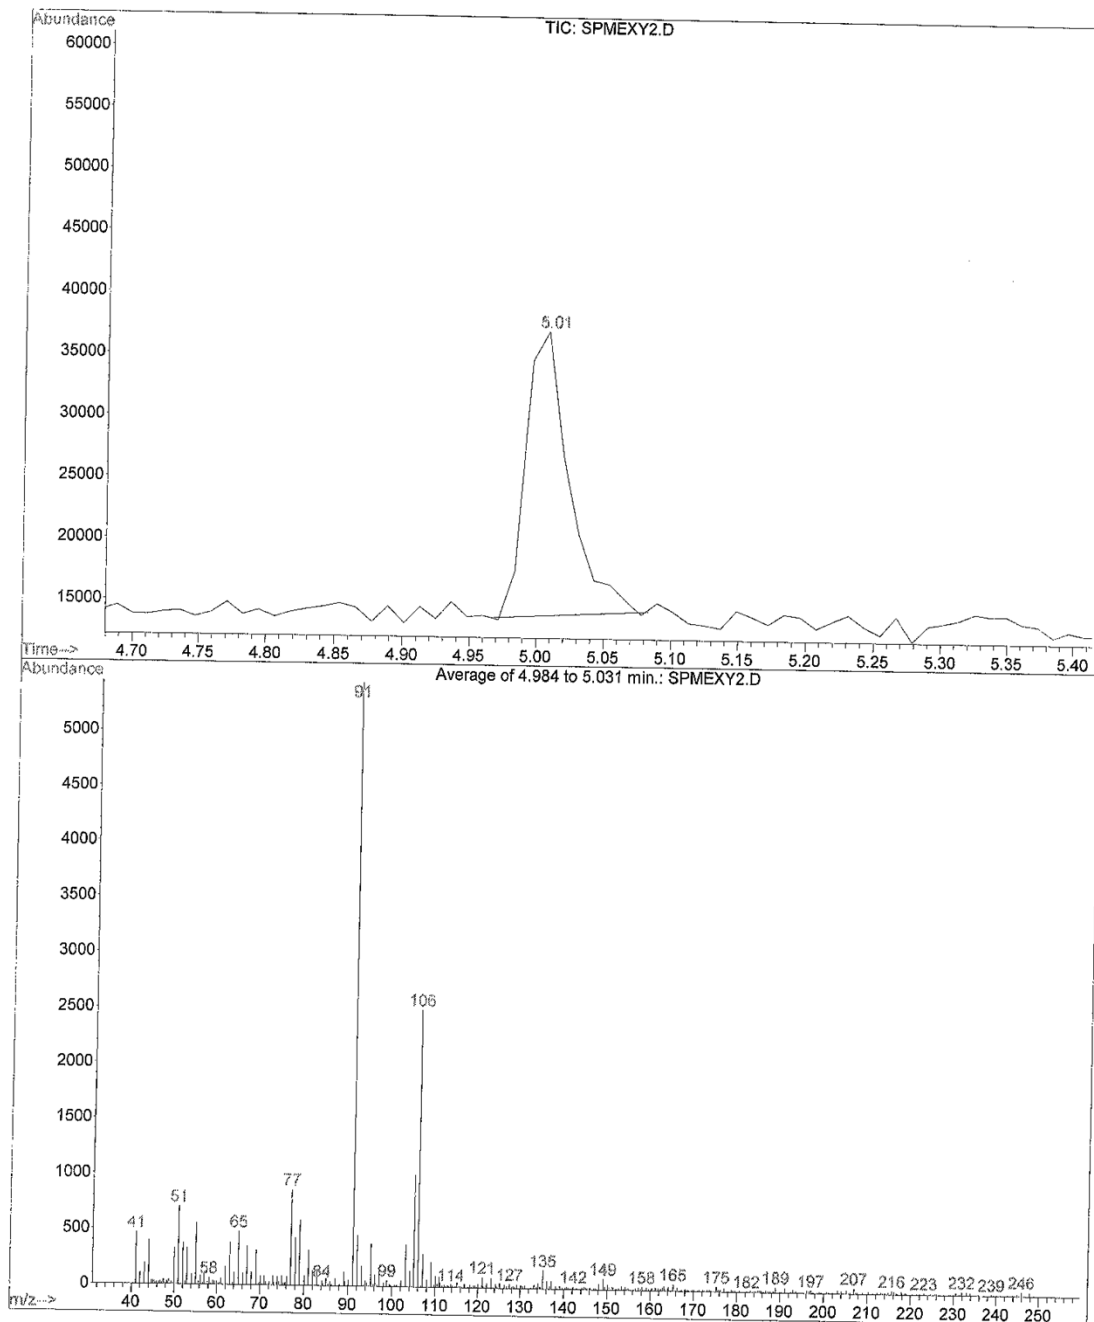

Figure S.22.1 – Expansion of GCMS peak at 5m 1s from Figure S.22, m-xylene

File : C:\HPCHEM\1\DATA\MATT\_F\SPMETR\SPMEXY2.D  
Operator : Matt  
Acquired : 11 Jan 2014 10:30 using AcqMethod MATT\_F  
Instrument : CSS Instr  
Sample Name: 85umPolyacFiber,DOE16R5,TGA off-gas  
Misc Info : Ti=30,20C/min,3min,Tf=150C,20C/min,1min  
Vial Number: 1

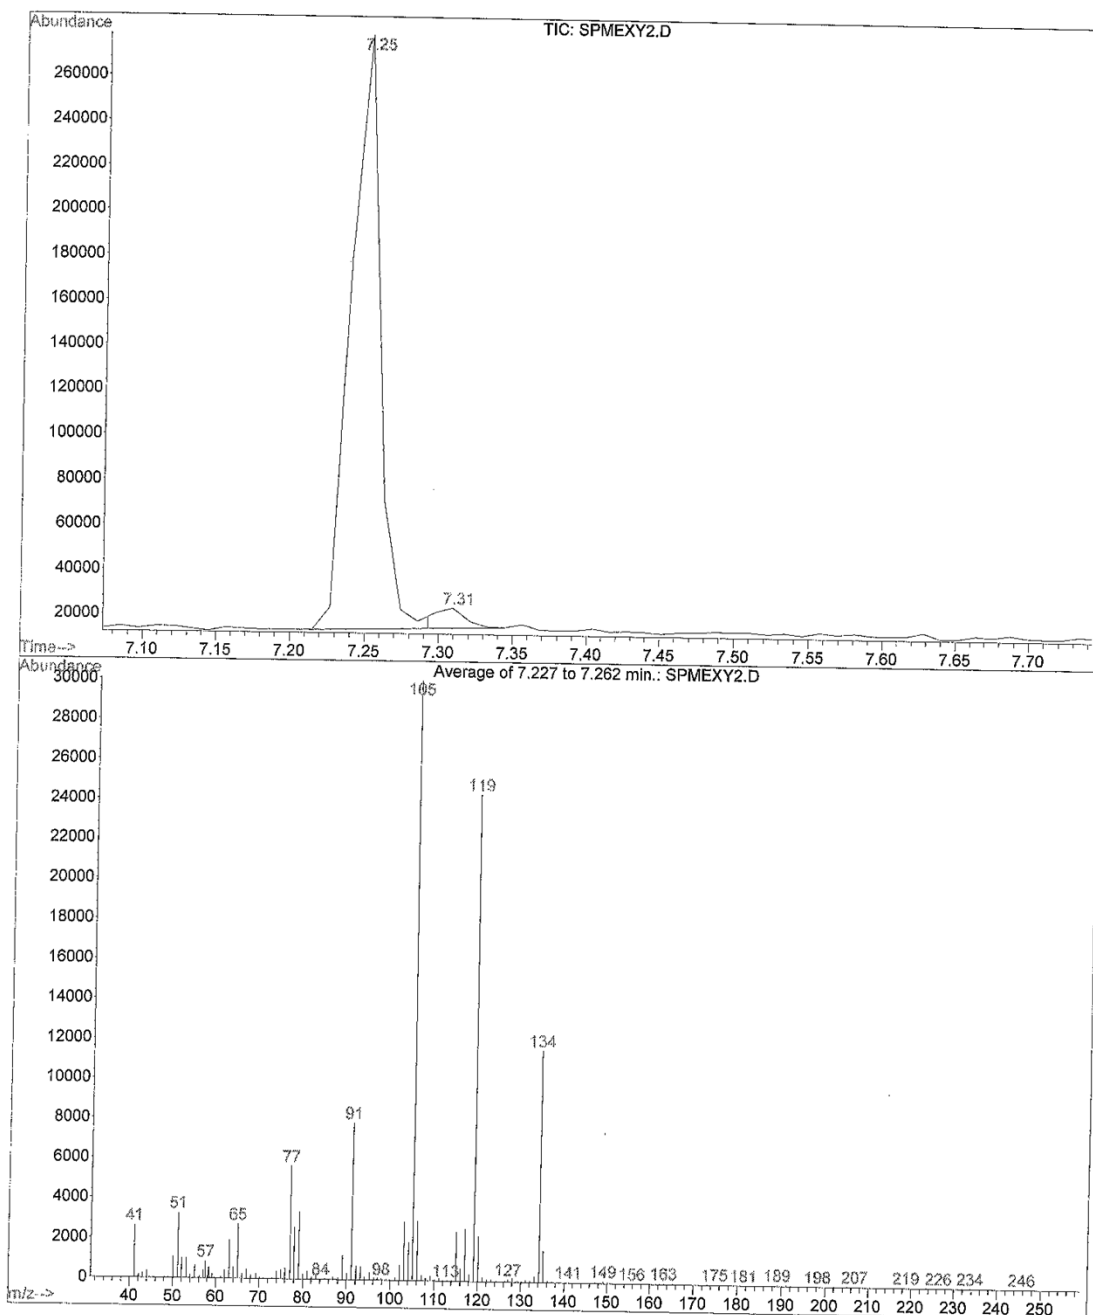

Figure S.22.2 – Expansion of GCMS peak at 7m 25s from Figure S.22, 1,3-diethylbenzene

TIC: SPMEXY2.D

85umPolyacFiber,DOE16R5,TGA off-gas

| Peak# | Ret Time | Type | Width | Area    | Start Time | End Time |
|-------|----------|------|-------|---------|------------|----------|
| 1     | 5.009    | PV   | 0.035 | 513353  | 4.967      | 5.083    |
| 2     | 7.252    | BV   | 0.025 | 3593104 | 7.213      | 7.293    |
| 3     | 7.311    | VV   | 0.028 | 140849  | 7.293      | 7.345    |
| 4     | 9.340    | PV   | 0.054 | 317579  | 9.229      | 9.425    |

Figure S.22.3 – Peak area from Figure S.22
